# Supplementary material for: Access to Monomeric Hydridoplumbate(II) Anions with Remarkable Thermostability
Source: Research Square preprint supplement (doi:10.21203/rs.3.rs-812025/v1), 2021-08-26
Supplement: Supplementary file 1 [file 445d9487b66c7393b9c5acc1.pdf]

# Access to Monomeric Hydridoplumbate(II) Anions with Remarkable Thermostability

Shuo Wang, Han-Jung Li, Wan-Ching Lee, Shuo-Ling Huang, Wen Chun Wu, Fong-Ku Shi  
Ting-Shen Kuo, I-Chung Lu, and Hsueh-Ju Liu\*

|                                                                                           |           |
|-------------------------------------------------------------------------------------------|-----------|
| <b>1. Experimental details, synthetic procedures, and characterizations .....</b>         | <b>2</b>  |
| 1.1 Synthesis of all compounds. ....                                                      | 3         |
| 1.2 NMR spectra of all compounds. ....                                                    | 5         |
| 1.3 IR spectrum of [Kcrypt222][1-H] and [Kcrypt222][1-D].....                             | 25        |
| <b>2. Details of ESI(–)-MS measurements and data analysis.....</b>                        | <b>26</b> |
| 2.1 ESI(–)MS Data for [1-H] <sup>–</sup> and [1-D] <sup>–</sup> .....                     | 27        |
| <b>3. Single-crystal X-ray diffraction crystal structure figures and data tables.....</b> | <b>29</b> |
| <b>4.Computational details .....</b>                                                      | <b>35</b> |
| <b>5.References.....</b>                                                                  | <b>38</b> |

## 1. Experimental details, synthetic procedures, and characterizations

All manipulations with oxygen and moisture sensitive materials were performed in a nitrogen-filled glovebox. Solvents were dried and deaerated using a solvent system (AsiaWong Enterprise co., Ltd.) prior to use. Benzene- $d_6$  and tetrahydrofuran- $d_8$  (THF- $d_8$ ) was dried over sodium and benzophenone, degassed by three freeze-pump-thaw cycles, and stored under nitrogen over 3 Å molecular sieves.  $KB^sBu_3H$  (K-selectride) was purchased from Sigma-Aldrich, used as received and stored in freezer of a glovebox. Cryptand-222 and 18-crown-6 were purchased from Sigma-Aldrich, used as received and stored in a glovebox. The compounds  $H_2L$ ,<sup>1</sup>  $Pb(HMDS)_2$ ,<sup>2</sup> and  $DBpin$ <sup>3</sup> were prepared according to literature procedures. The NMR spectra were recorded using Bruker 300, Varian 400 or Varian 600 MHz spectrometers. The NMR spectra were referenced to residual protonated solvent for  $^1H$  NMR (3.58 ppm for compound in THF- $d_8$ ; 7.16 ppm for compound in benzene- $d_6$ ), to deuterated solvent for  $^{13}C$  NMR (67.21 ppm for compound in THF- $d_8$  and 128.06 for compound in benzene- $d_6$ ), and to  $Pb(NO)_3$  for  $^{207}Pb$  NMR (0 ppm in  $D_2O$ ). All spectra were recorded at 25 °C. Complex multiplets are noted as “m” and broad resonances as “br”. Elemental analyses were performed using an Elementar vario EL CUBE (CHN-OS Rapid, German). IR spectra were recorded in a glovebox and measured with Thermo Scientific Nicolet™ Summit Fourier transform infrared (FT-IR) spectrometer with an attenuated-total-reflectance (ATR) attachment. The transmittance band positions are reported uncorrected, in reciprocal centimeters.

## 1.1 Synthesis of all compounds.

### Synthesis of LPbTHF<sub>2</sub> (1-THF<sub>2</sub>).

A solution of Pb(HMDS)<sub>2</sub> (719.5 mg, 1.36 mmol) in 5 mL of toluene was added to a solution of H<sub>2</sub>L (699.9 mg, 1.36 mmol) in 10 mL of toluene at ambient temperature. The solution turned to red from yellow immediately and resulted in visible precipitates. After stirring at ambient temperature for 13 h, the mixture was cooled to –35 °C, and the supernatant was removed by decanting. The remaining solid was washed three times with 10 mL of pentane and then dried under vacuum to afford a red-orange powder {LPb}<sub>n</sub>. Yield: 930.5 mg (95%). This product is barely soluble in benzene or toluene, whereas it reacts with THF to form the monomeric adduct 1-THF<sub>2</sub> that is soluble in THF. Red-orange crystals were obtained by diffusion of pentane into the saturated THF solution at –35 °C for 5 days. Yield: 85%. <sup>1</sup>H NMR (500 MHz, THF-*d*<sub>8</sub>) δ = 7.62 (d, *J* = 7.3 Hz, 4H), 7.38 (d, *J* = 7.0 Hz, 4H), 7.30–7.23 (m, 8H), 7.16 (t, *J* = 7.4 Hz, 2H), 7.10 (t, *J* = 7.9 Hz, 1H), 7.05 (t, *J* = 7.4 Hz, 2H), 6.90 (d, *J* = 7.9 Hz, 2H), 6.52 (s, 2H) ppm; <sup>13</sup>C{<sup>1</sup>H} NMR (151 MHz, THF-*d*<sub>8</sub>) δ = 155.58, 144.78, 140.41, 138.72, 137.93, 130.90, 130.05, 129.24, 128.84, 128.69, 126.22, 125.65, 125.45, 115.72, 114.03 ppm; <sup>207</sup>Pb{<sup>1</sup>H} NMR (105 MHz, THF-*d*<sub>8</sub>) δ = 422.8 ppm. Anal. calcd for C<sub>49</sub>H<sub>49</sub>N<sub>3</sub>O<sub>3</sub>Pb (1-THF<sub>2</sub>·THF): C, 62.94; H, 5.28; N, 4.49. Found: C, 63.33; H, 5.29; N, 4.48.

### Synthesis of [K18c6][1-H].

A solution of k-selectride (48.6 μL, 0.049 mmol) in 1.5 mL THF was cooled at –35 °C and was added dropwise to a precooled solution containing {LPb}<sub>n</sub> (35.2 mg, 0.049 mmol) and excess 18-crown-6 (32.1 mg, 0.121 mmol) in 5 mL THF. The clear orange red solution turned yellow was observed upon addition. The mixture was warmed to ambient temperature and stirred for 10 minutes, and was concentrated under vacuum to ca. 2 mL. Addition of pentane resulted in the formation of a yellow powder, and the supernatant was removed by decanting. The remaining solid was washed three times with 5 mL of pentane and then dried under vacuum to afford a yellow powder. Yield: 45.5 mg (81%). <sup>1</sup>H NMR (600 MHz, THF-*d*<sub>8</sub>, 263K): δ = 41.40 (s, <sup>1</sup>*J*<sub>207PbH</sub> = 1312 Hz, 1H, PbH), 7.76 (d, *J* = 7.6 Hz, 4H), 7.40 (d, *J* = 7.2 Hz, 4H), 7.22 (q, *J* = 7.4 Hz, 8H), 7.08 (t, *J* = 7.4 Hz, 2H), 6.94 (t, *J* = 7.2 Hz, 2H), 6.84 (q, *J* = 5.4 Hz, 3H), 6.46 (s, 2H), 3.32 (s, 36H, O–CH<sub>2</sub>–CH<sub>2</sub>–O of 18-crown-6) ppm. <sup>13</sup>C{<sup>1</sup>H} NMR (151 MHz, THF-*d*<sub>8</sub>, 263K): δ = 156.61, 142.97, 142.56, 140.50, 136.63, 135.45, 130.14, 128.67, 128.35, 128.24, 125.29, 124.89, 123.96, 114.36, 112.96, 71.00 ppm. <sup>207</sup>Pb{<sup>1</sup>H} NMR (104.84 MHz, THF-*d*<sub>8</sub>, 263K): δ = 1450.1 (d, <sup>1</sup>*J*<sub>207PbH</sub> = 1320 Hz) ppm.

### Synthesis of [Kcrypt222][1-H].

A solution of k-selectride (208.9 μL, 0.209 mmol) in 1.5 mL THF was cooled at –35 °C and was added dropwise to a precooled solution containing {LPb}<sub>n</sub> (150.2 mg, 0.209 mmol) and [2.2.2]-cryptand (78.6 mg, 0.209 mmol) in 10 mL THF. The clear orange red solution turned yellow was observed upon addition. The mixture was warmed to ambient temperature and stirred for 10 minutes, and the volume of the solution was concentrated under vacuum to ca. 2 mL. Diffusion of pentane into the filtered and saturated THF solution at –35 °C afforded yellow crystals of [Kcrypt222][1-H]. Yield: 213.5 mg (90%). Due to the low solubility of [Kcrypt222][1-H] in THF-*d*<sub>8</sub> (<1-2 mg/mL), no satisfactory <sup>13</sup>C and <sup>207</sup>Pb resonances were found after prolonged scans. <sup>1</sup>H NMR (600 MHz, THF-*d*<sub>8</sub>, 263K): δ = 41.66 (s, 1H, PbH), 7.82 (d, *J* = 7.6 Hz, 4H), 7.44 (d, *J* = 7.2 Hz, 4H), 7.29 – 7.21 (m, 8H), 7.11 (t, *J* = 7.5 Hz, 2H), 6.97 (t, *J* = 7.3 Hz, 2H), 6.93 – 6.85 (m, 3H), 6.51 (s, 2H), 3.33 (s, 12H, O–CH<sub>2</sub>–CH<sub>2</sub>–O), 3.30 – 3.23 (m, 12H, O–CH<sub>2</sub>–CH<sub>2</sub>–N), 2.33 – 2.29 (m, 12H, N–CH<sub>2</sub>–CH<sub>2</sub>–O) ppm. Anal. calcd for C<sub>55</sub>H<sub>62</sub>KN<sub>5</sub>O<sub>6</sub>Pb: C, 58.18; H, 5.50; N, 6.17. Found: C, 58.56; H, 5.35; N, 6.17. ESI-MS calcd for [C<sub>37</sub>H<sub>26</sub>N<sub>3</sub>Pb]<sup>+</sup>: 720.19. Found: 720.33.

### Synthesis of [Kcrypt222][1-OBz] and [K18c6][1-OBz].

Method 1: Benzaldehyde (3.8 mg, 0.036 mmol) was added to a precooled solution of [Kcrypt222][1-H] (40.6 mg, 0.036 mmol) in 10 mL THF at –35 °C, and the resulting solution was stirred at ambient temperature for 1 hr. The cloudy yellow solution turned into a clear orange-yellow solution was observed

immediately. The solution was filtered through a plug of Celite, and the filtrate was dried under vacuum. Yield: 40.22 mg (90%). Cooling down the hot, saturated benzene solution of **[Kcrypt222][1-OBz]** afforded analytically pure yellow crystals.

Method 2: A precooled solution of potassium benzyloxide (4.12 mg, 0.028 mmol) in 2 mL THF was added to a THF solution containing **{LPb}<sub>n</sub>** (20.3 mg, 0.028 mmol), and [2.2.2]-cryptand (10.8 mg, 0.029 mmol) at  $-35^{\circ}\text{C}$ . The resulting solution turned orange yellow was observed and stirred at room temperature for 2 hrs. The solution was filtered through a plug of Celite, and the filtrate was dried under vacuum. Yield: 29.8 mg (85%).

**<sup>1</sup>H NMR** (400 MHz, THF-*d*<sub>8</sub>)  $\delta$  = 8.12 (d, *J* = 7.7 Hz, 4H), 7.44 (d, *J* = 7.6 Hz, 4H), 7.24 (q, *J* = 7.2, 6.7 Hz, 10H), 7.12 (t, *J* = 7.3 Hz, 2H), 6.97 (q, *J* = 7.6 Hz, 4H), 6.90 (t, *J* = 5.1 Hz, 3H), 6.84 (t, *J* = 7.1 Hz, 1H), 6.51 (s, 2H), 5.37 (s, 2H), 3.21 (s, 12H, O-CH<sub>2</sub>-CH<sub>2</sub>-O), 3.14 (t, *J* = 4.17 Hz, 12H, O-CH<sub>2</sub>-CH<sub>2</sub>-N), 2.18 (t, *J* = 4.17 Hz, 12H, N-CH<sub>2</sub>-CH<sub>2</sub>-O) ppm. **<sup>13</sup>C{<sup>1</sup>H} NMR** (101 MHz, THF-*d*<sub>8</sub>)  $\delta$  = 156.13, 152.65, 144.01, 142.12, 140.11, 136.79, 136.32, 130.13, 129.92, 128.72, 128.36, 127.43, 127.03, 126.46, 125.36, 124.67, 124.13, 114.91, 112.89, 70.90, 69.07, 68.00, 54.29 ppm. **<sup>207</sup>Pb{<sup>1</sup>H} NMR** (126 MHz, THF-*d*<sub>8</sub>)  $\delta$  = 874.6 ppm. Anal. calcd for **Kcrypt222[1-OBz]·0.5 benzene** (C<sub>65</sub>H<sub>71</sub>KN<sub>5</sub>O<sub>7</sub>Pb): C, 60.96; H, 5.59; N, 5.47. Found: C, 60.98; H, 5.61; N, 5.74.

**[K18c6][1-OBz]** can be obtained in a similar procedure with yield of 26.1 mg (82%).

#### Synthesis of **[K18c6][1-D]**.

To a precooled solution of **[K18c6][1-OBz]** (19.8 mg, 0.017 mmol) in THF, deuterated pinacolborane (DBpin, 0.138 M in C<sub>6</sub>D<sub>6</sub>, 127  $\mu\text{L}$ , 0.017 mmol) was added, and the mixture was stirred at room temperature for 10 mins. The solution was then concentrated under vacuum to ca. 2 mL. Addition of pentane resulted in the formation of a yellow powder, and the supernatant was removed by decanting. The remaining solid was washed three times with 5 mL of pentane and then dried under vacuum to afford a yellow powder **[K18c6][1-D]**. Yield: 45.5 mg (81%). **[K1crypt222][1-D]** can be obtained in a similar manner with yield of 36.8 mg (94%).

**<sup>1</sup>H NMR** (400 MHz, THF-*d*<sub>8</sub>)  $\delta$  = 7.77 (d, *J* = 7.4 Hz, 4H), 7.43 (d, *J* = 7.3 Hz, 4H), 7.32 – 7.21 (m, 8H), 7.12 (t, *J* = 7.3 Hz, 2H), 6.98 (t, *J* = 7.1 Hz, 2H), 6.89 (m, 3H), 6.49 (s, 2H), 3.32 (s, 36H, 18-crown-6) ppm. **<sup>2</sup>H NMR** (61 MHz, THF-*d*<sub>8</sub>)  $\delta$  = 40.93 (s, 1H) ppm. **<sup>207</sup>Pb NMR** (126 MHz, THF-*d*<sub>8</sub>)  $\delta$  = 1445.1 (br) ppm. ESI-MS calcd for [C<sub>37</sub>H<sub>25</sub>DN<sub>3</sub>Pb]<sup>+</sup>: 721.20. Found: 721.42.

## 1.2 NMR spectra of all compounds.

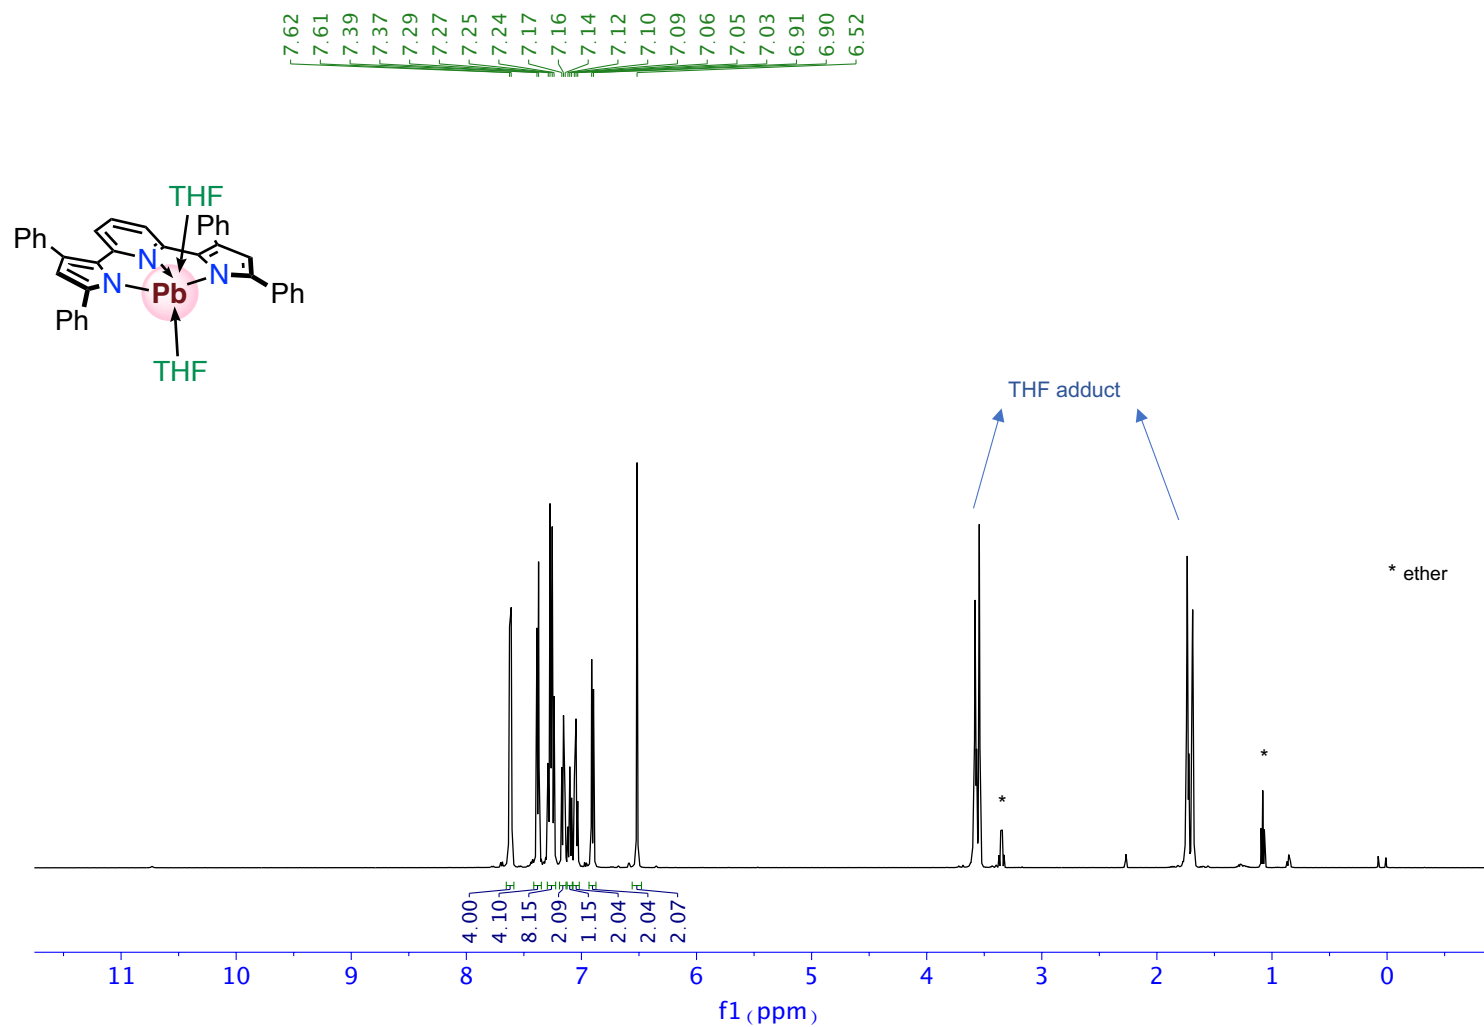

**Figure S1.** <sup>1</sup>H NMR spectrum of **1-THF<sub>2</sub>** (THF-*d*<sub>8</sub>, 298K)



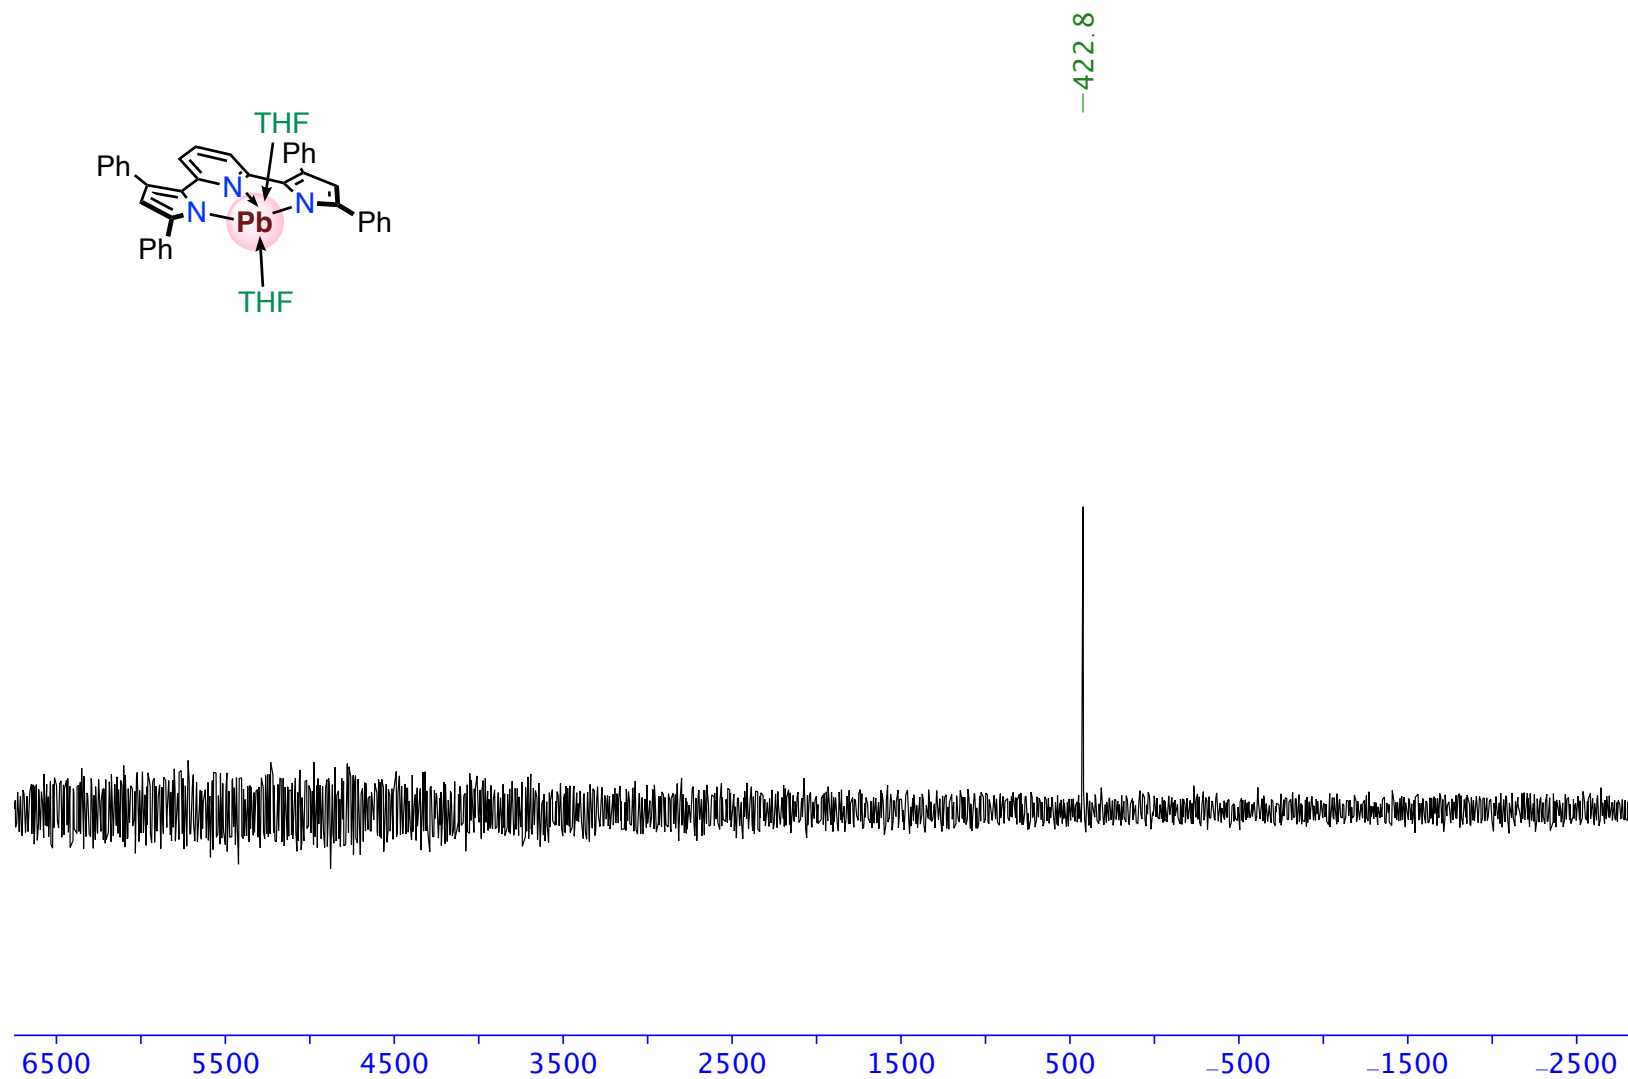

**Figure S3.**  $^{207}\text{Pb}\{^1\text{H}\}$  NMR spectrum of **1**-THF<sub>2</sub> (THF-*d*<sub>8</sub>, 298K)

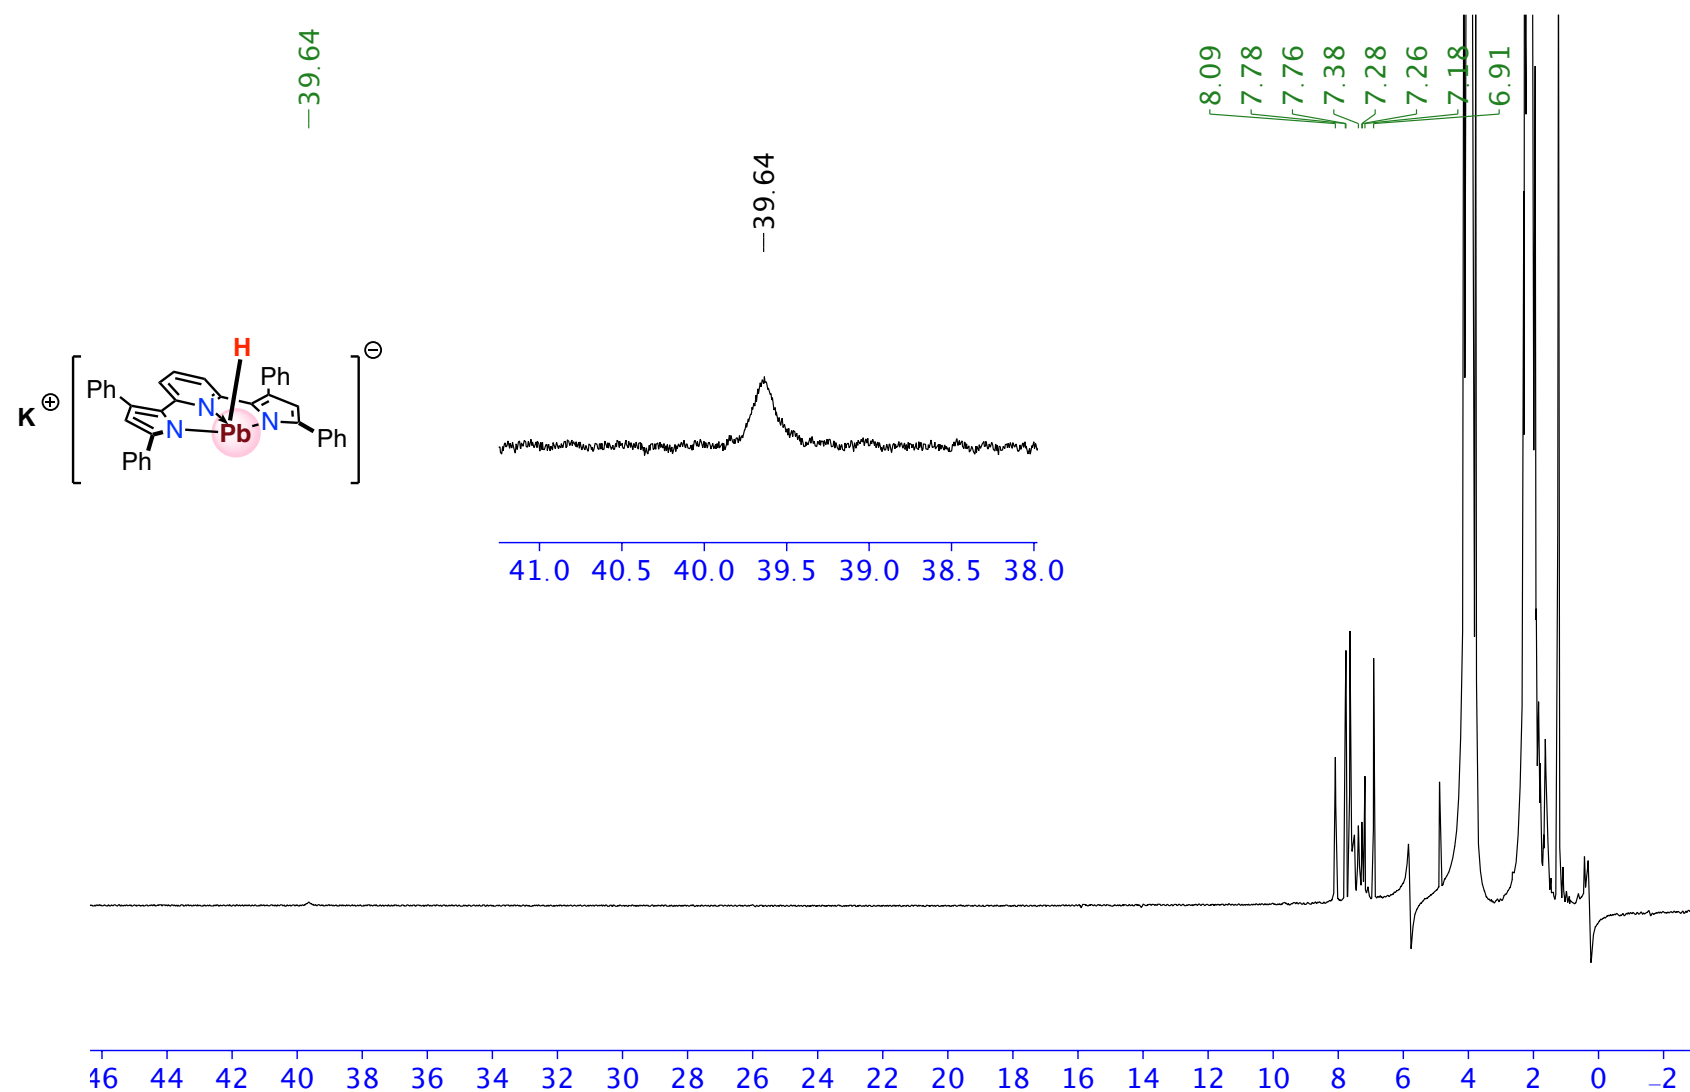

**Figure S4.**  $^1\text{H}$  NMR spectrum of  $\text{K}^+[\text{1-H}]$  (THF/ $\text{C}_6\text{D}_6$  capillary, 263K)



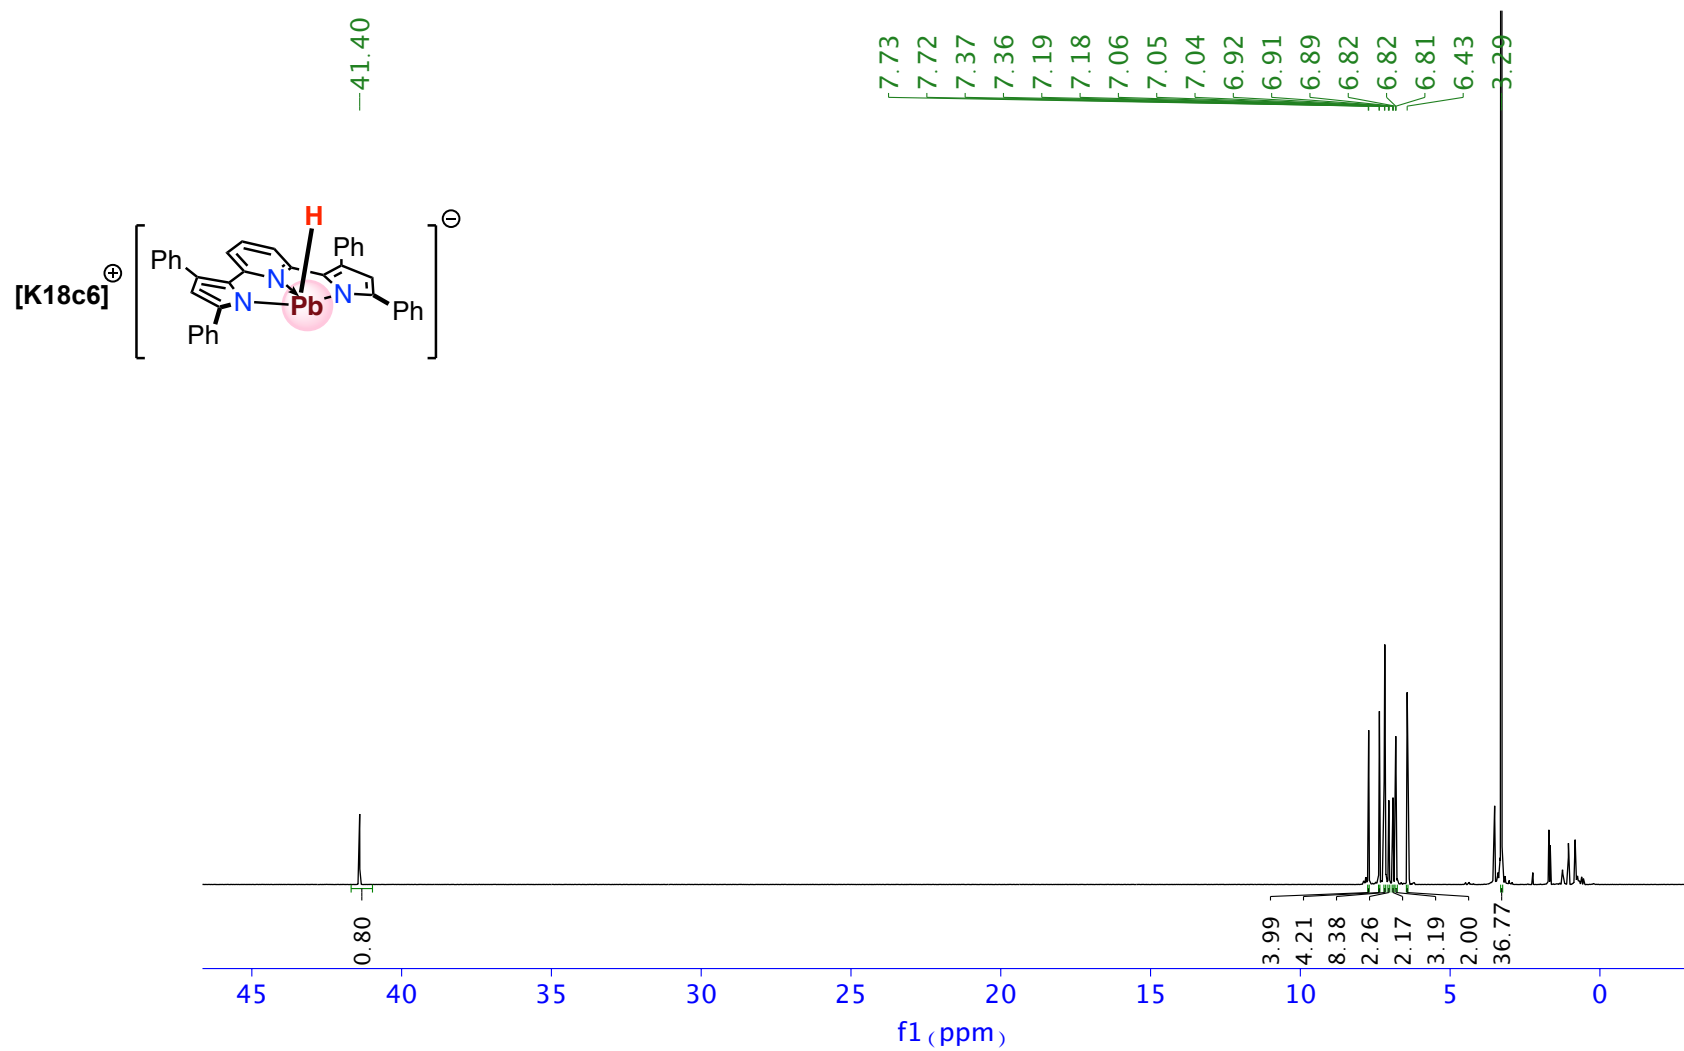

**Figure S5.**  $^1H$  NMR spectrum of  $[K18c6][1-H]$  (THF- $d_8$ , 263K)

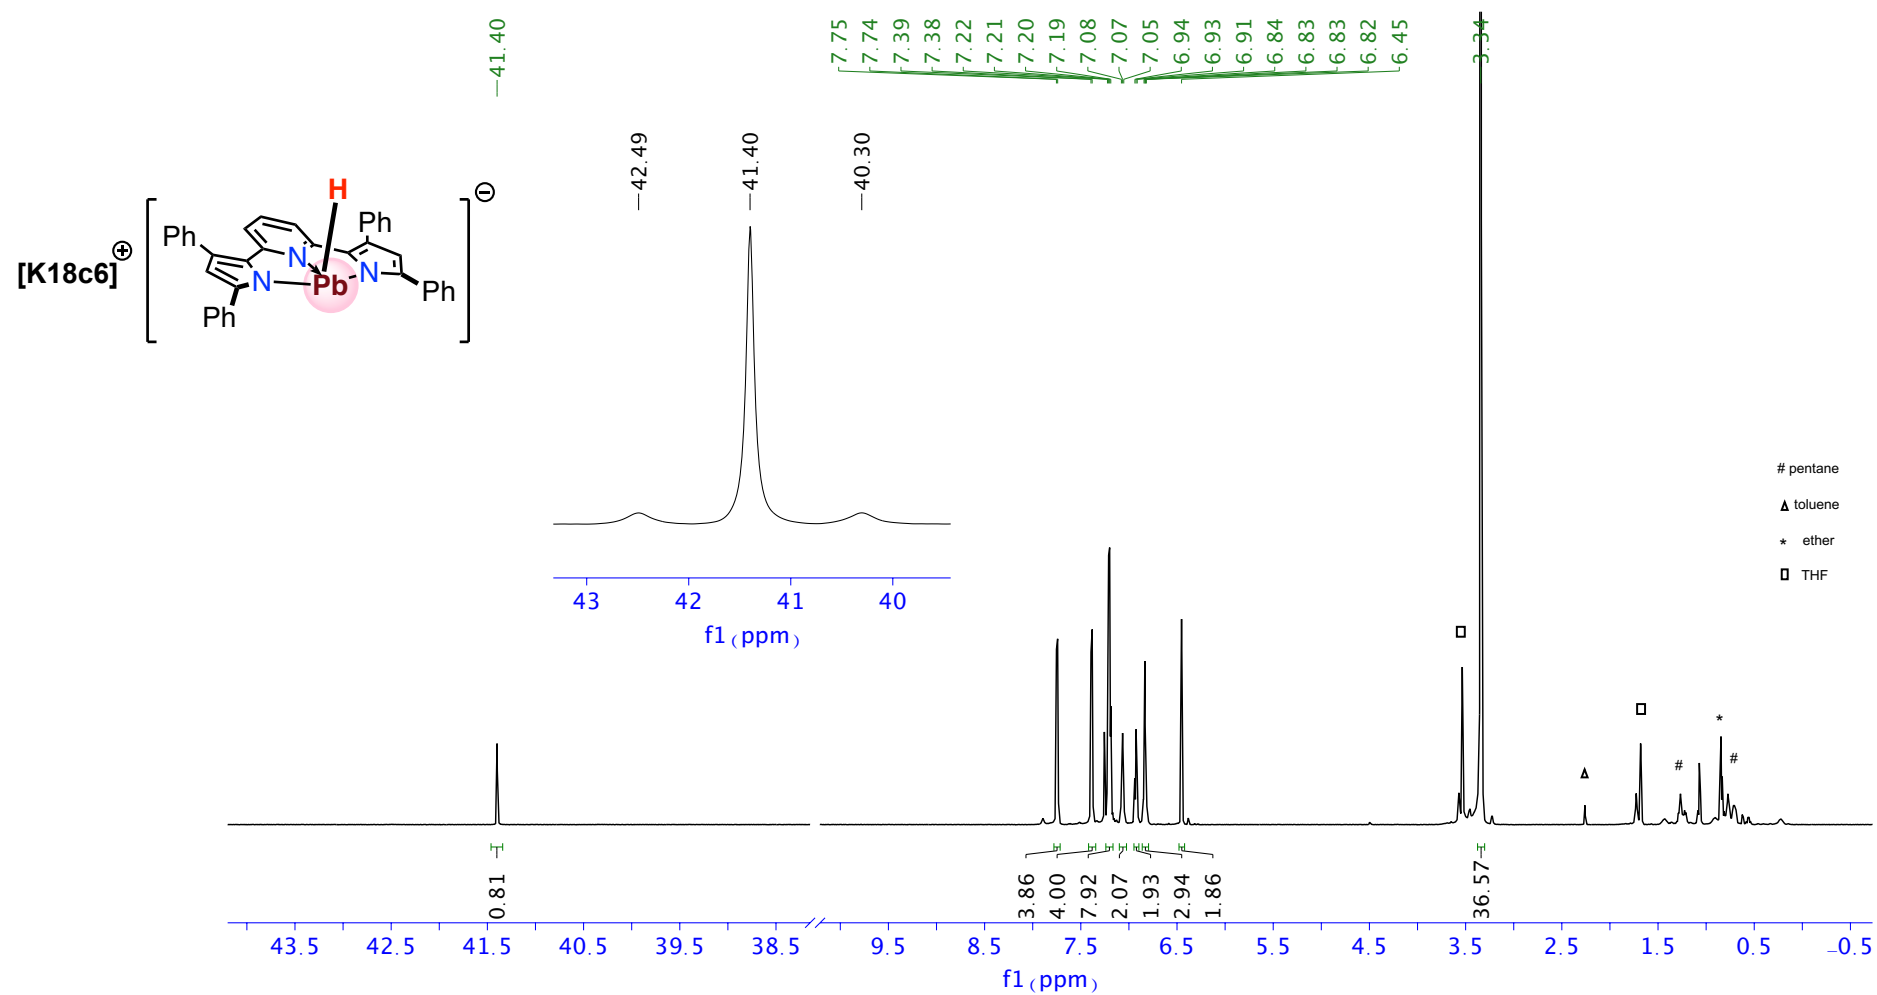

**Figure S6.** The enlarged part of the <sup>1</sup>H NMR spectrum of [K18c6][1-H] (THF-d<sub>8</sub>, 263K)

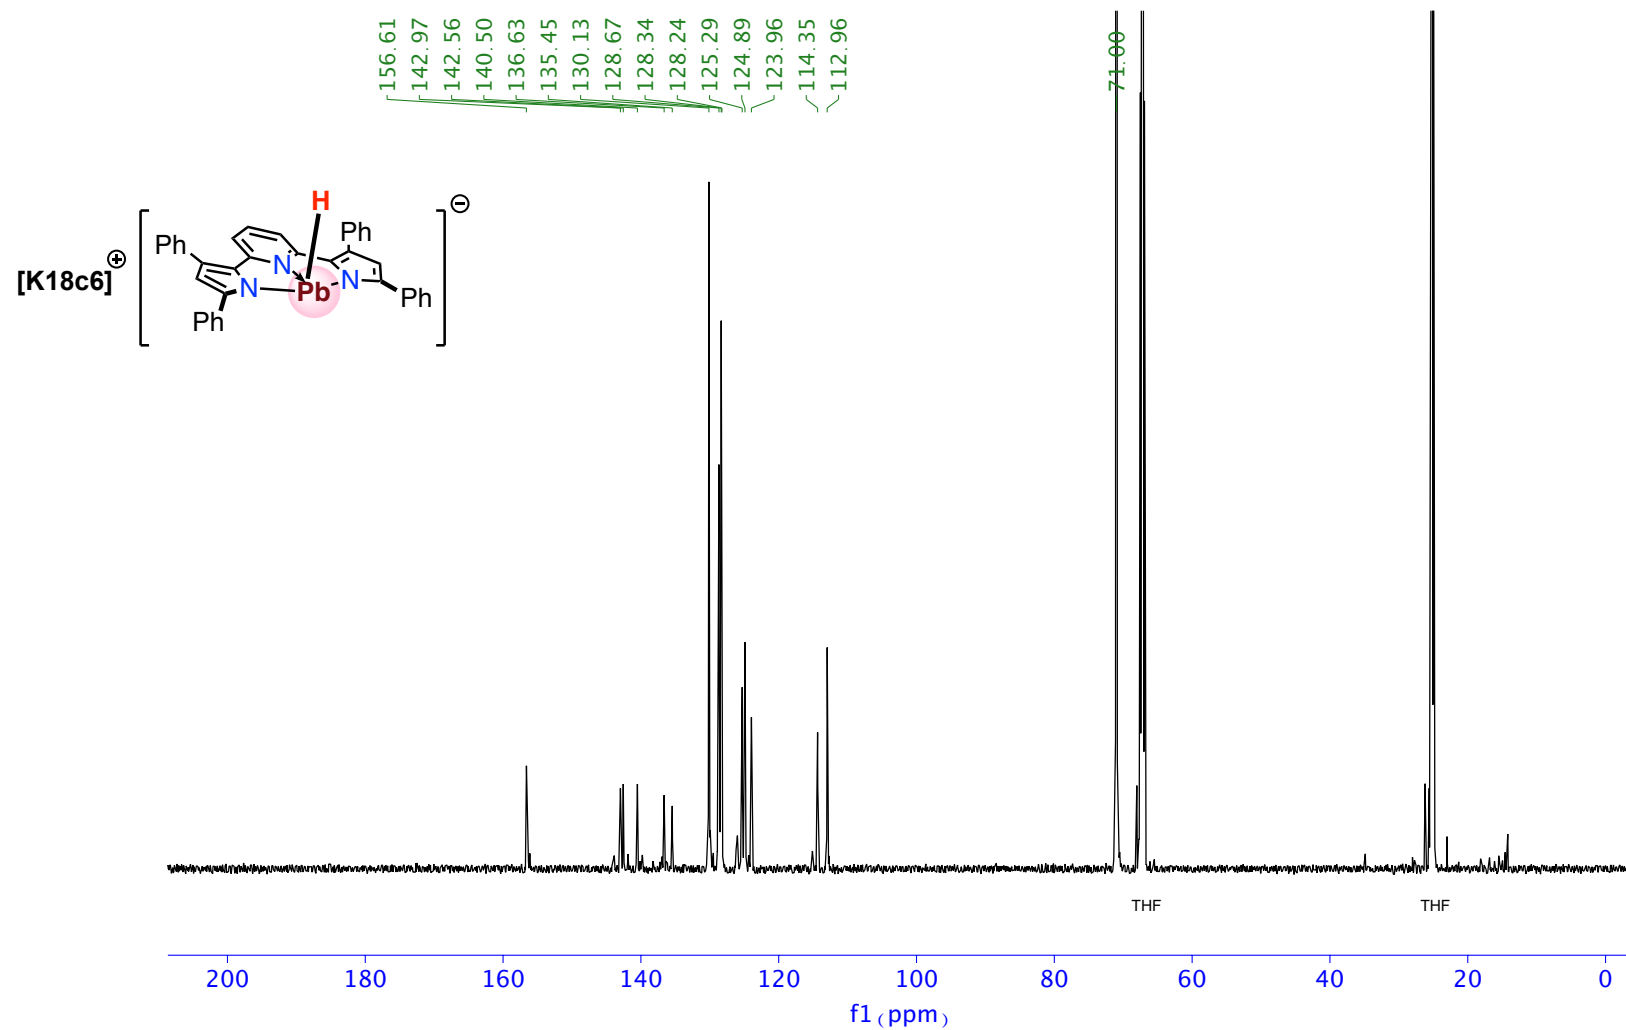

**Figure S7.**  $^{13}C\{^1H\}$  NMR spectrum of  $[K18c6][1-H]$  (THF- $d_8$ , 263K). Small amounts of  $LK_2$  can be detected due to decomposition of  $[K18c6][1-H]$ .

Current Data Parameters  
 NAME liuhj-wangs-20Mar11-Pb-THF  
 EXPNO 207099  
 PROCNO 1

F2 - Acquisition Parameters  
 Date\_ 20200311  
 Time 22.38  
 INSTRUM spect  
 PROBHD 5 mm CPPBBO BB  
 PULPROG zgig30  
 TD 65400  
 SOLVENT THF  
 NS 12280  
 DS 4  
 SWH 1000000.000 Hz  
 FIDRES 15.290520 Hz  
 AQ 0.0327000 sec  
 RG 2050  
 DW 0.500 usec  
 DE 18.00 usec  
 TE 263.0 K  
 D1 3.00000000 sec  
 D11 0.03000000 sec  
 TD0 1000

===== CHANNEL f1 =====  
 SFO1 104.8435403 MHz  
 NUC1 207Pb  
 P1 9.50 usec  
 PLW1 65.00000000 W

===== CHANNEL f2 =====  
 SFO2 500.1905070 MHz  
 NUC2 1H  
 CPDPRG[2] waltz16  
 PCPD2 80.00 usec  
 PLW2 19.50000000 W  
 PLW12 0.40294999 W

F2 - Processing parameters  
 SI 32768  
 SF 104.6385637 MHz  
 WDW EM  
 SSB 0  
 LB 30.00 Hz  
 GB 0  
 PC 1.00

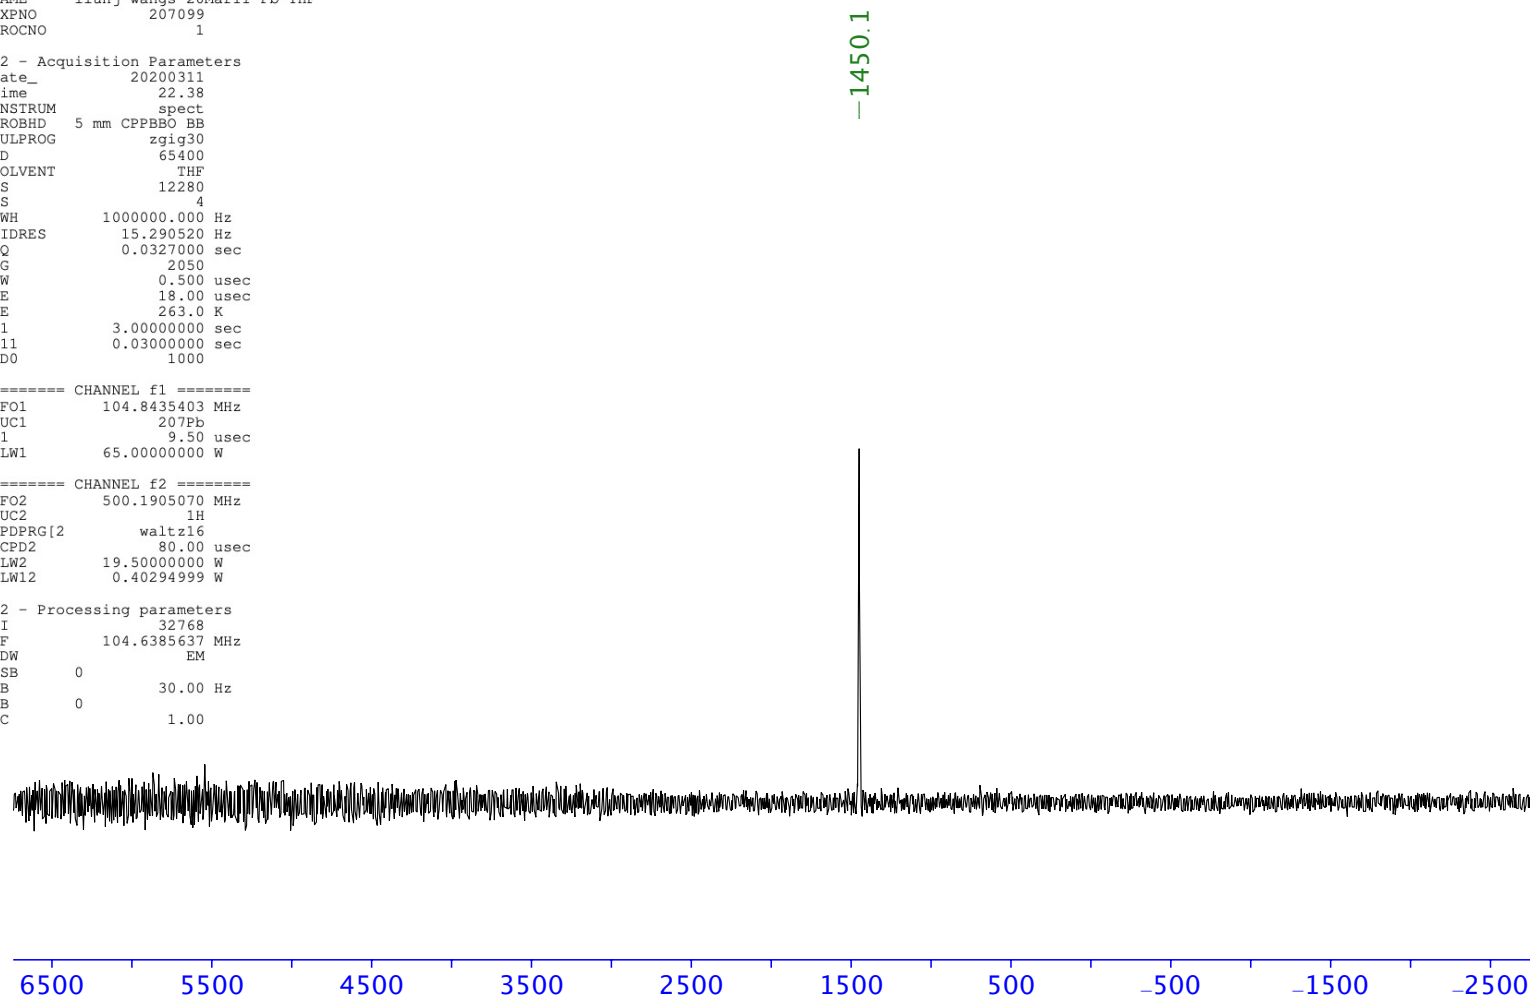

**Figure S8.**  $^{207}\text{Pb}\{^1\text{H}\}$  NMR spectrum of **[K18c6][1-H]** (THF- $d_8$ , 263K)

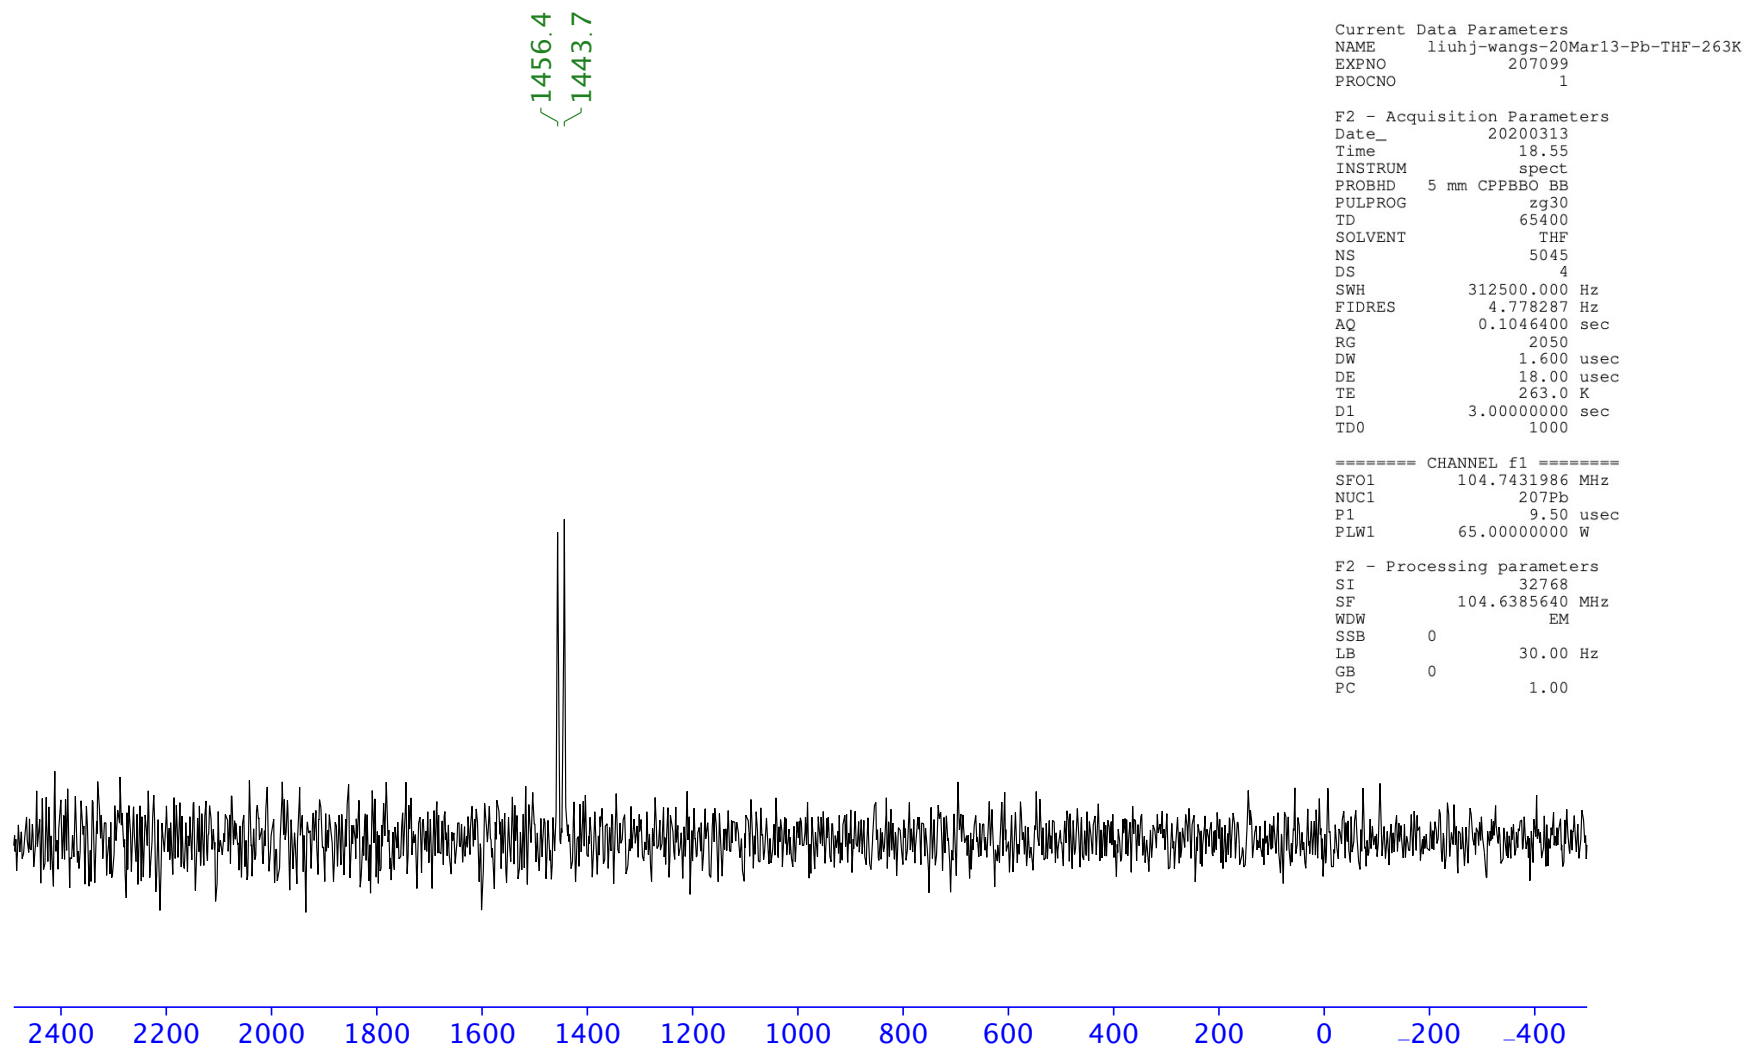

**Figure S9.** The proton-coupled  $^{207}\text{Pb}$  NMR spectrum of **[K18c6][1-H]** (THF- $d_8$ , 263K)

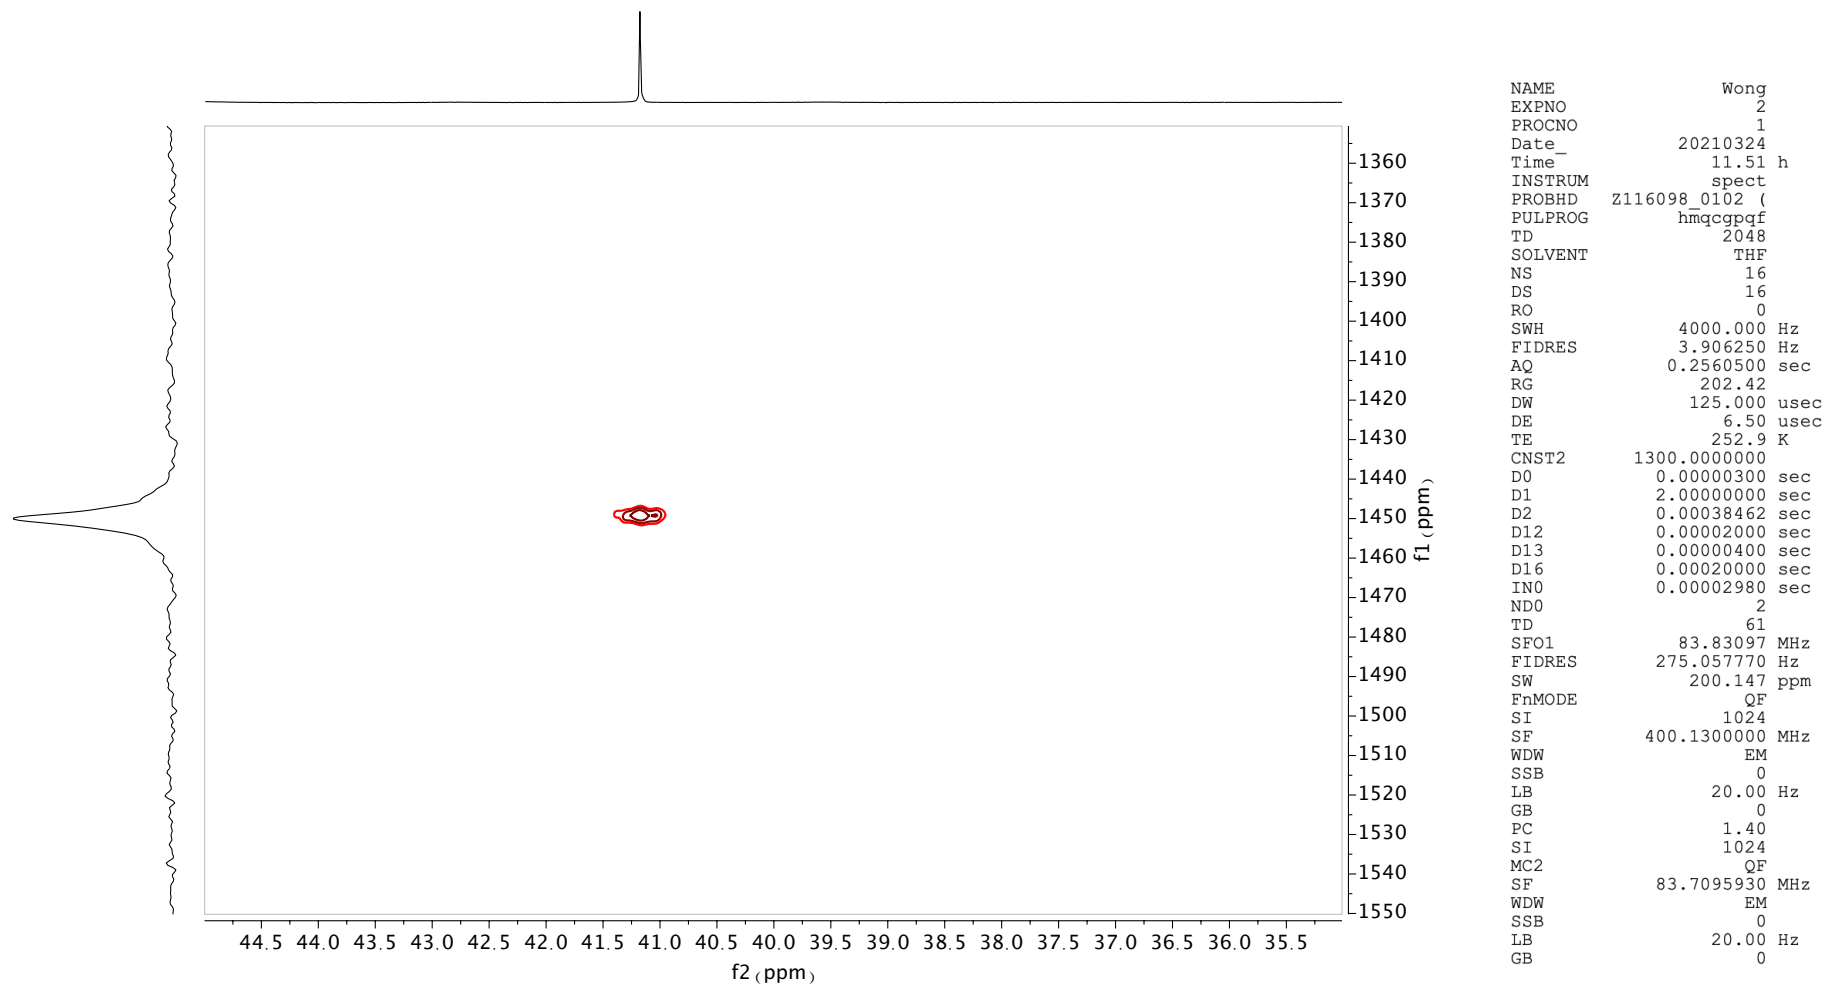

**Figure S10.**  $^1\text{H}$ - $^{207}\text{Pb}$  HMQC NMR spectrum of **[K18c6][1-H]** (THF- $d_8$ , 253K)

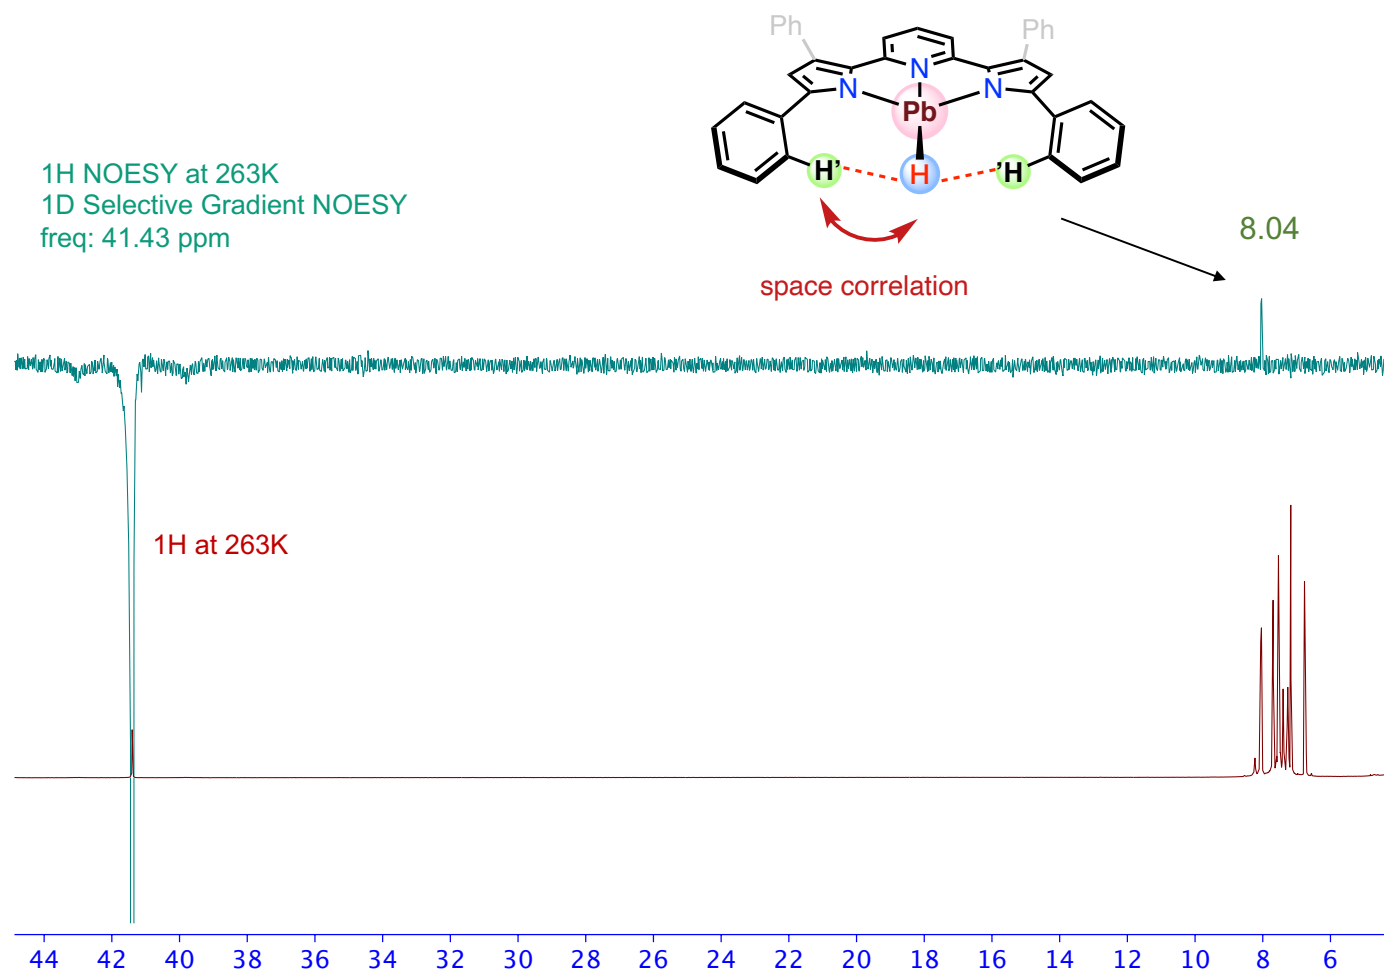

**Figure S11.** The stacked 1D  $^1\text{H}$  NOESY spectrum (top) and  $^1\text{H}$  NMR spectrum (bottom) of **[K18c6][1-H]** (THF- $d_8$ , 263K).

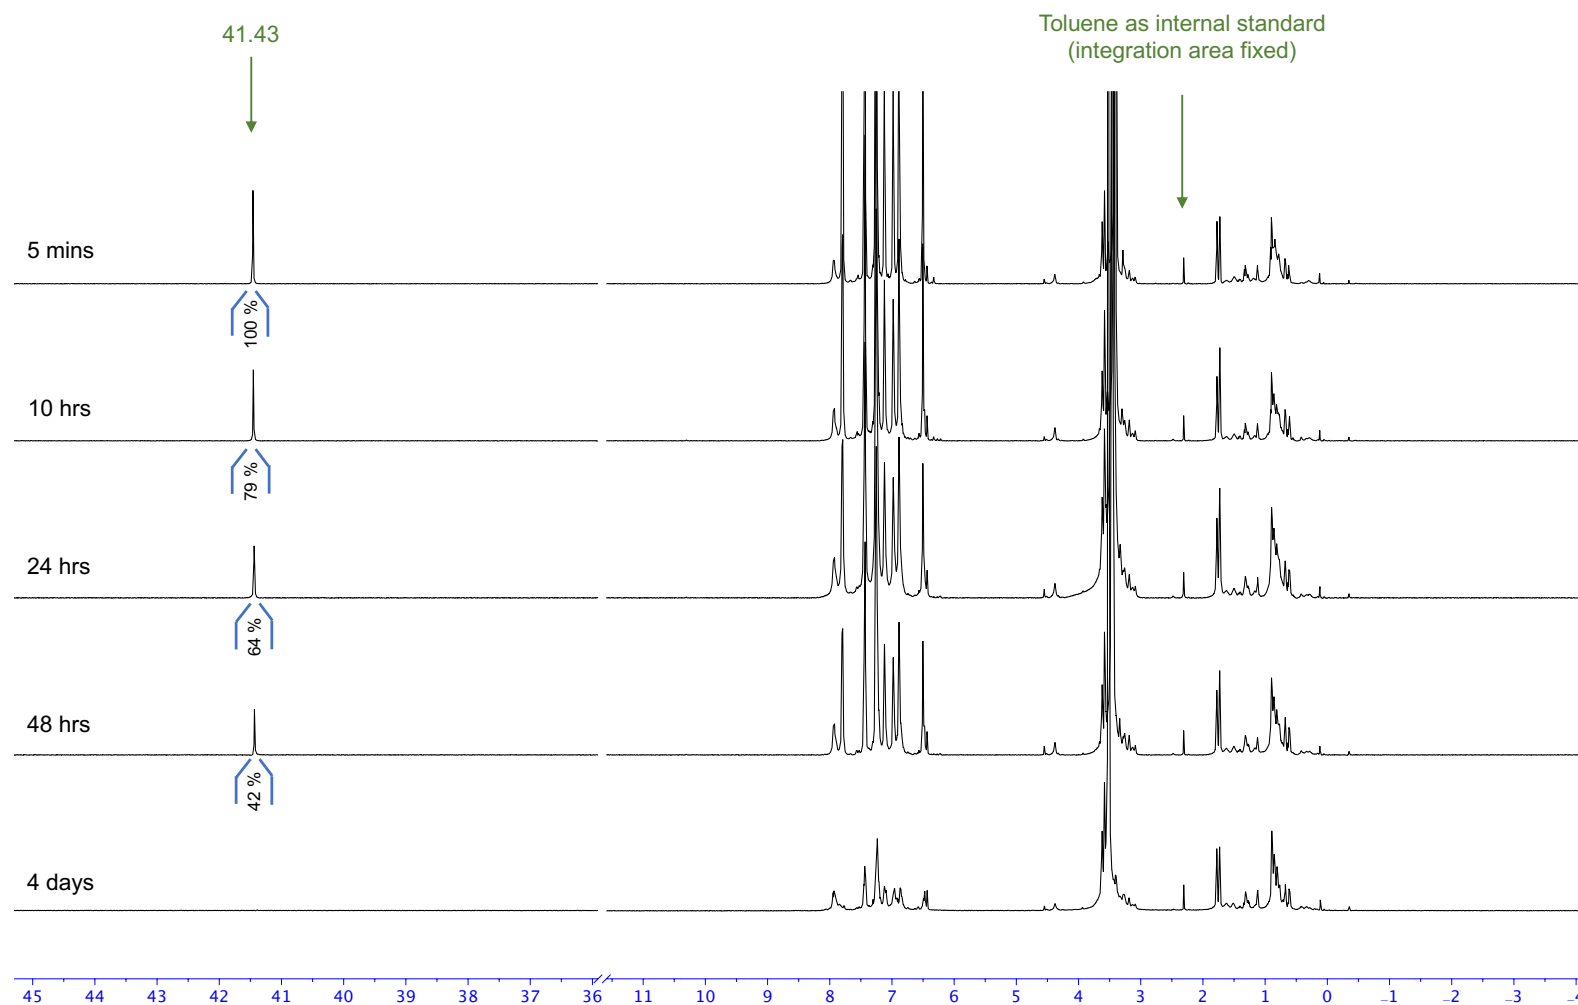

**Figure S12:** Decomposition reaction of **[K18c6][1-H]** monitored by  $^1\text{H}$  NMR spectroscopy over 4 days at ambient temperature using residual toluene as the internal standard ( $\text{THF-}d_8$ , 298K).



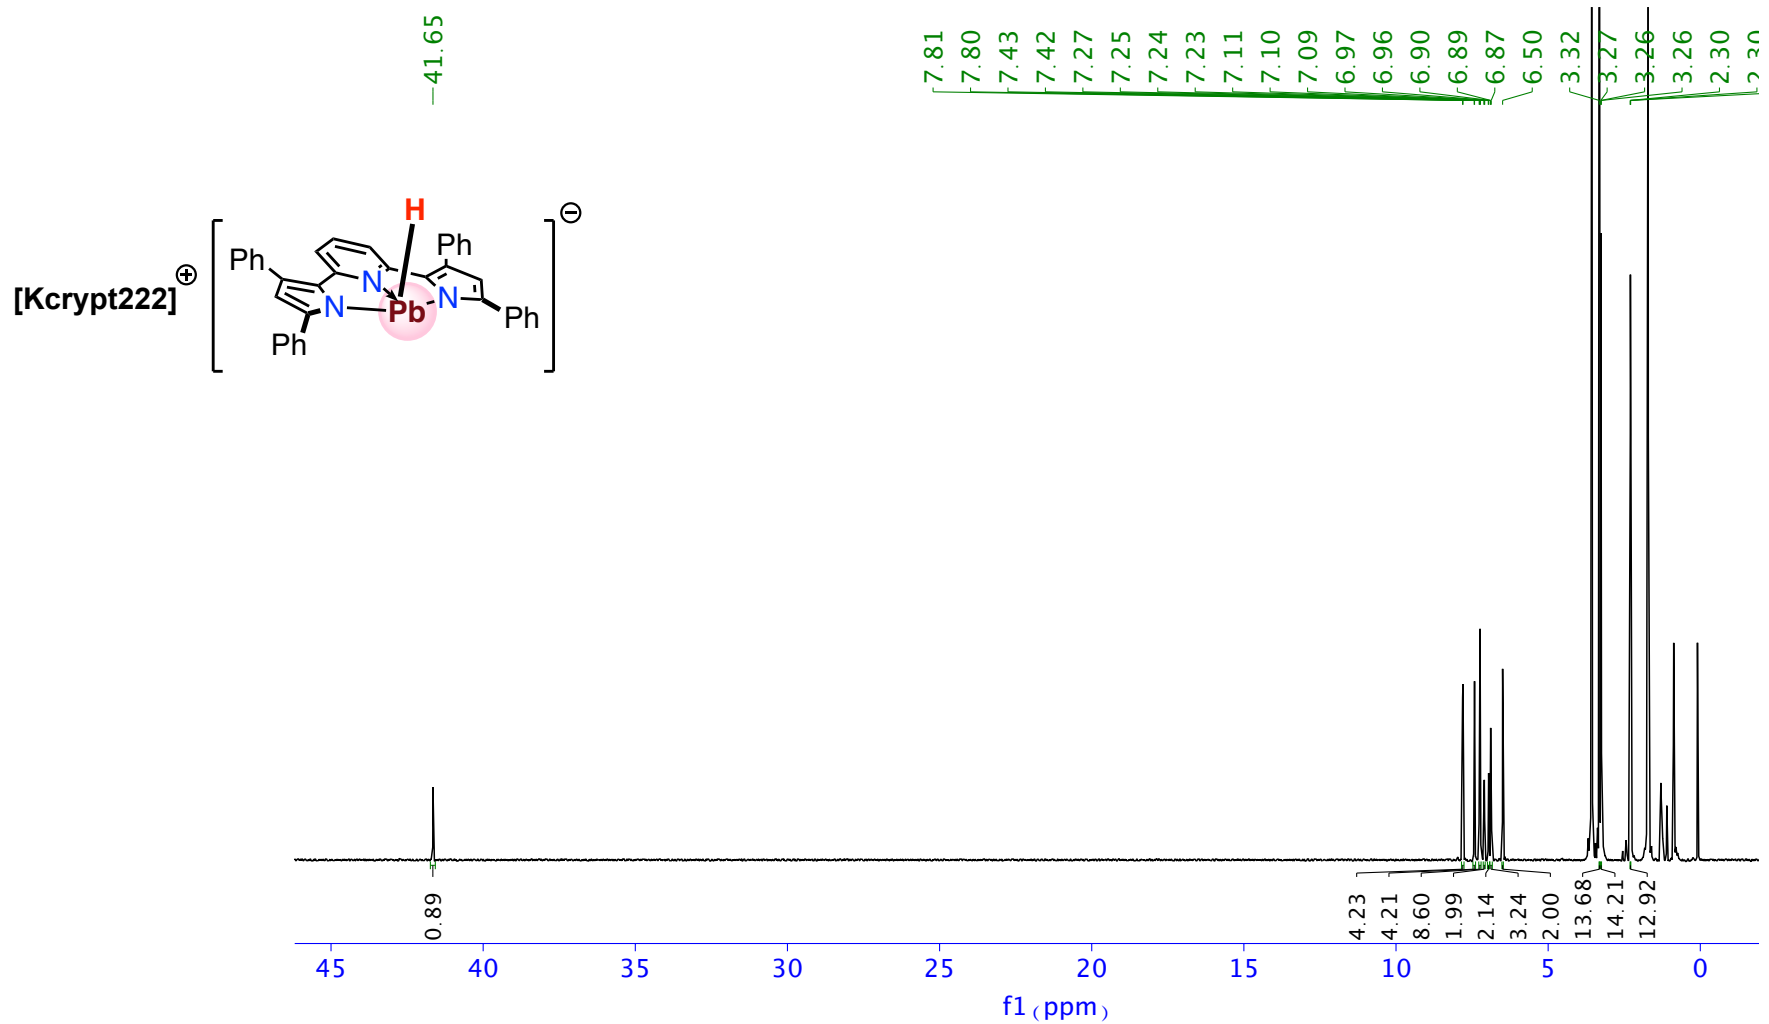

**Figure S13.** <sup>1</sup>H NMR spectrum of [Kcrypt222][1-H] (THF-d<sub>8</sub>, 263K)

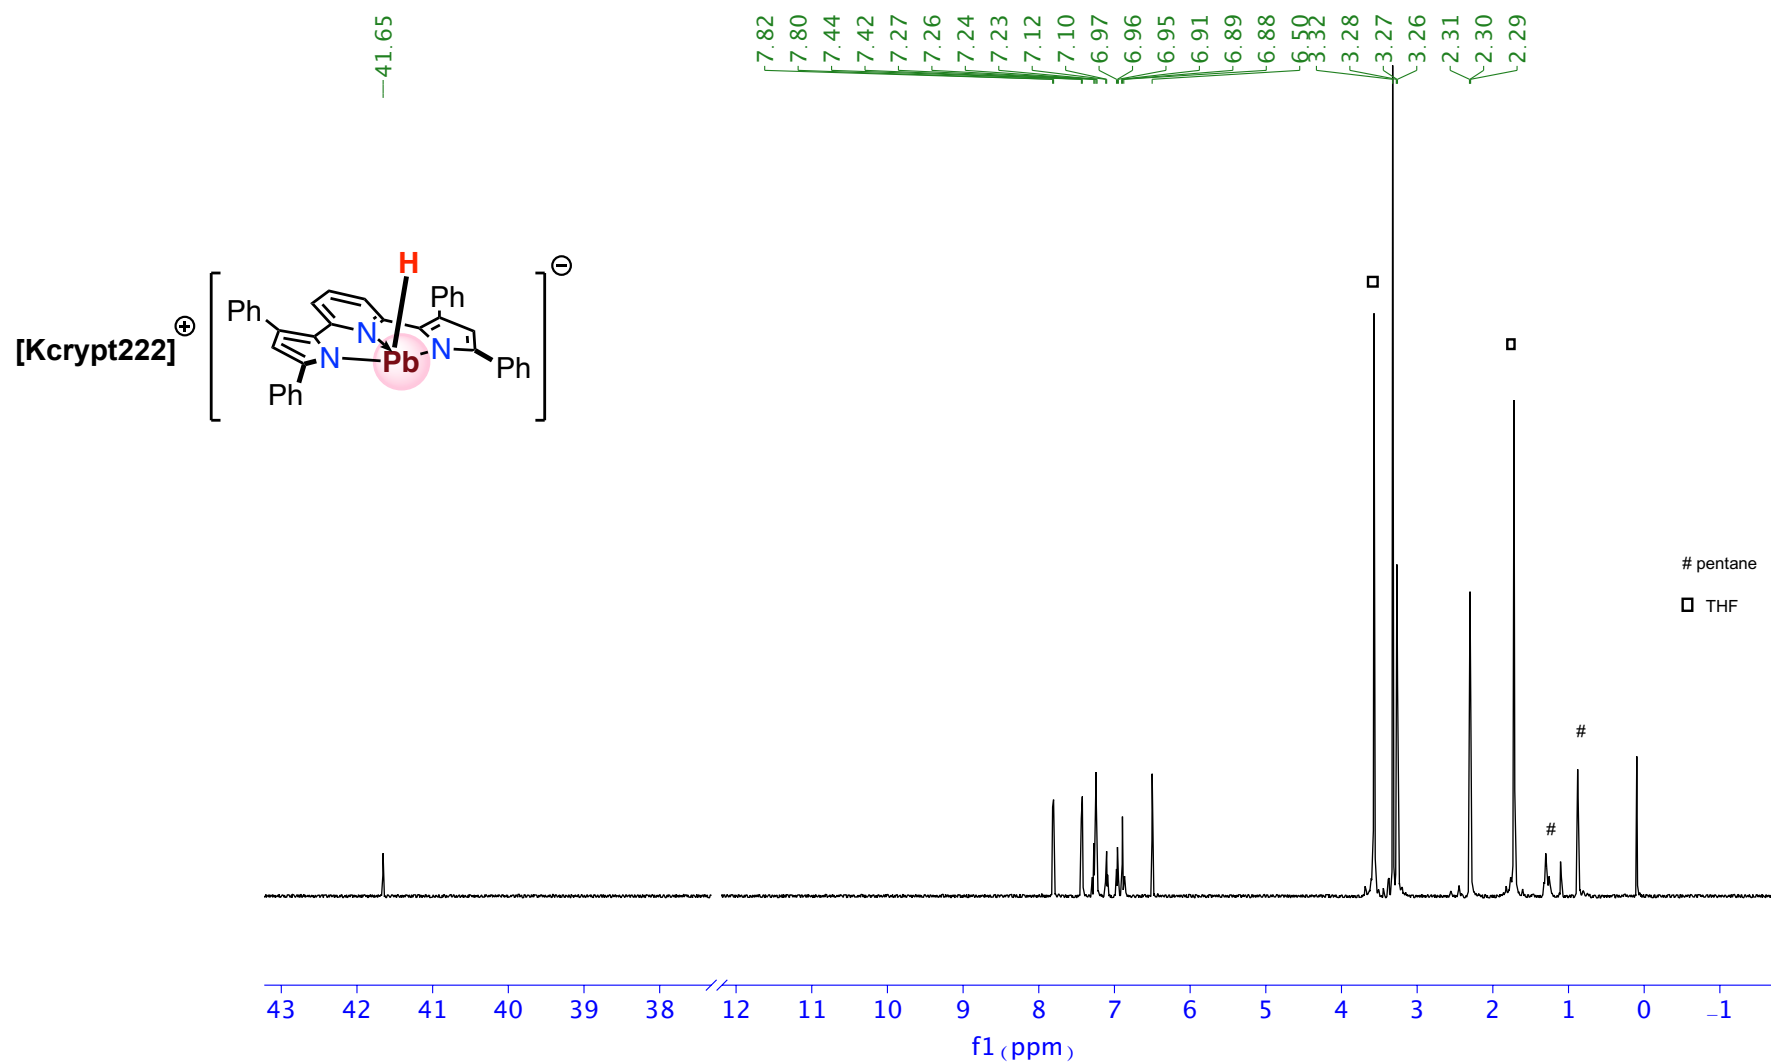

**Figure S14.** The enlarged part of the <sup>1</sup>H NMR spectrum of [Kcrypt222][1-H] (THF-d<sub>8</sub>, 263K)

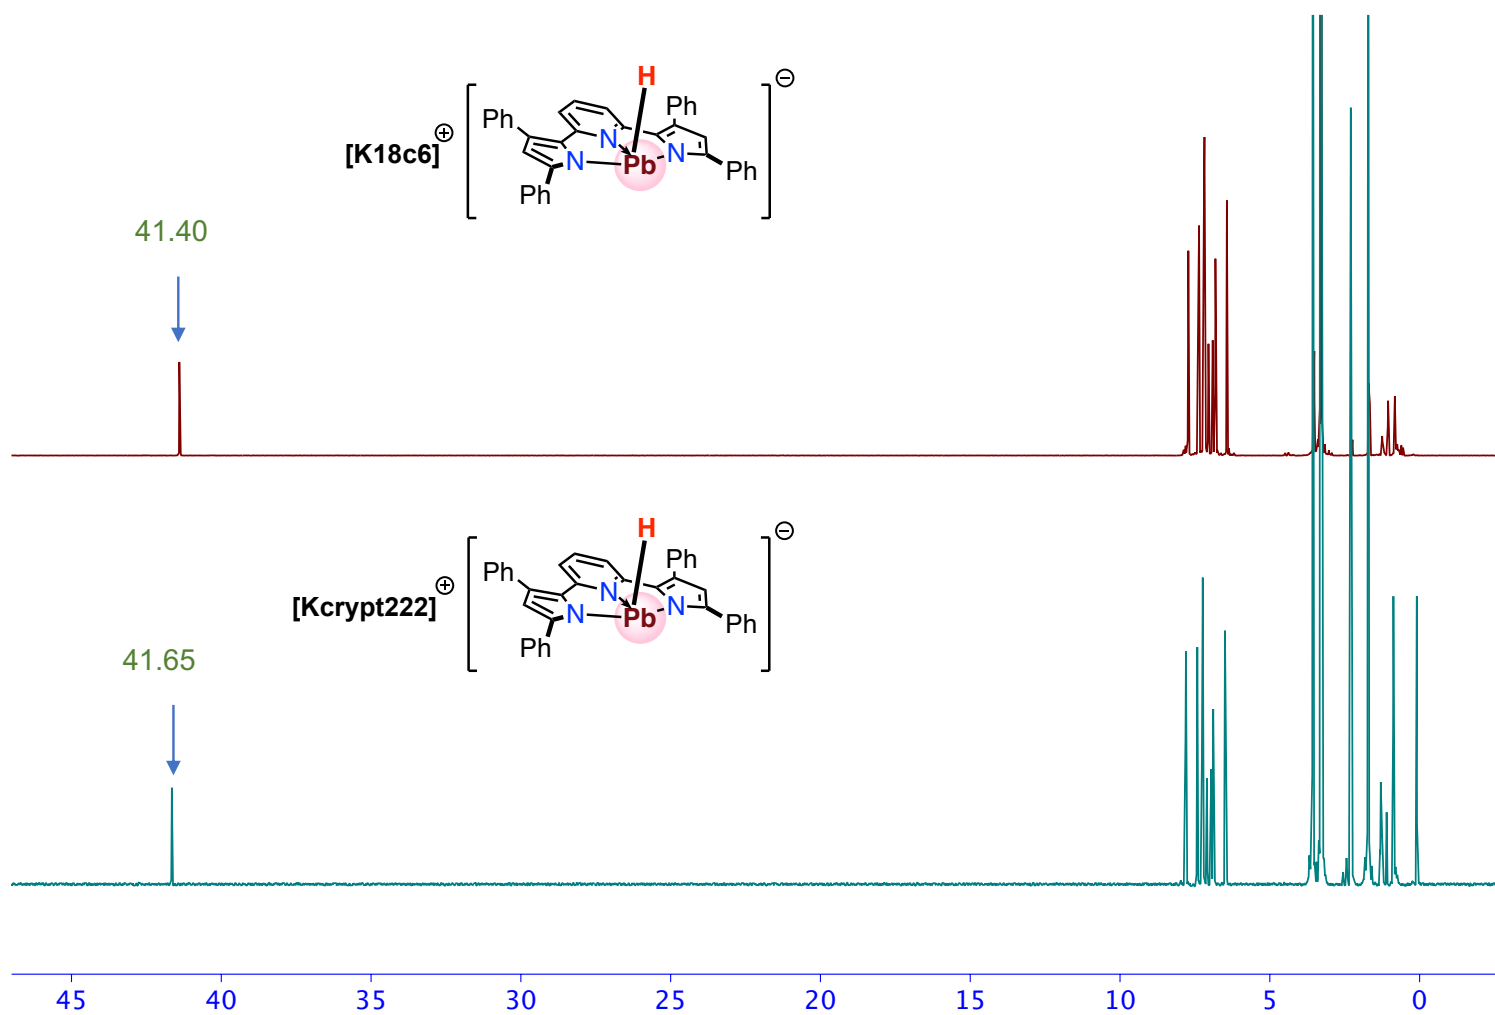

**Figure S15.** The stacked  $^1\text{H}$  NMR spectra of [K18c6][1-H] (top) and [Kcrypt222][1-H] (bottom) (THF- $d_8$ , 263K)

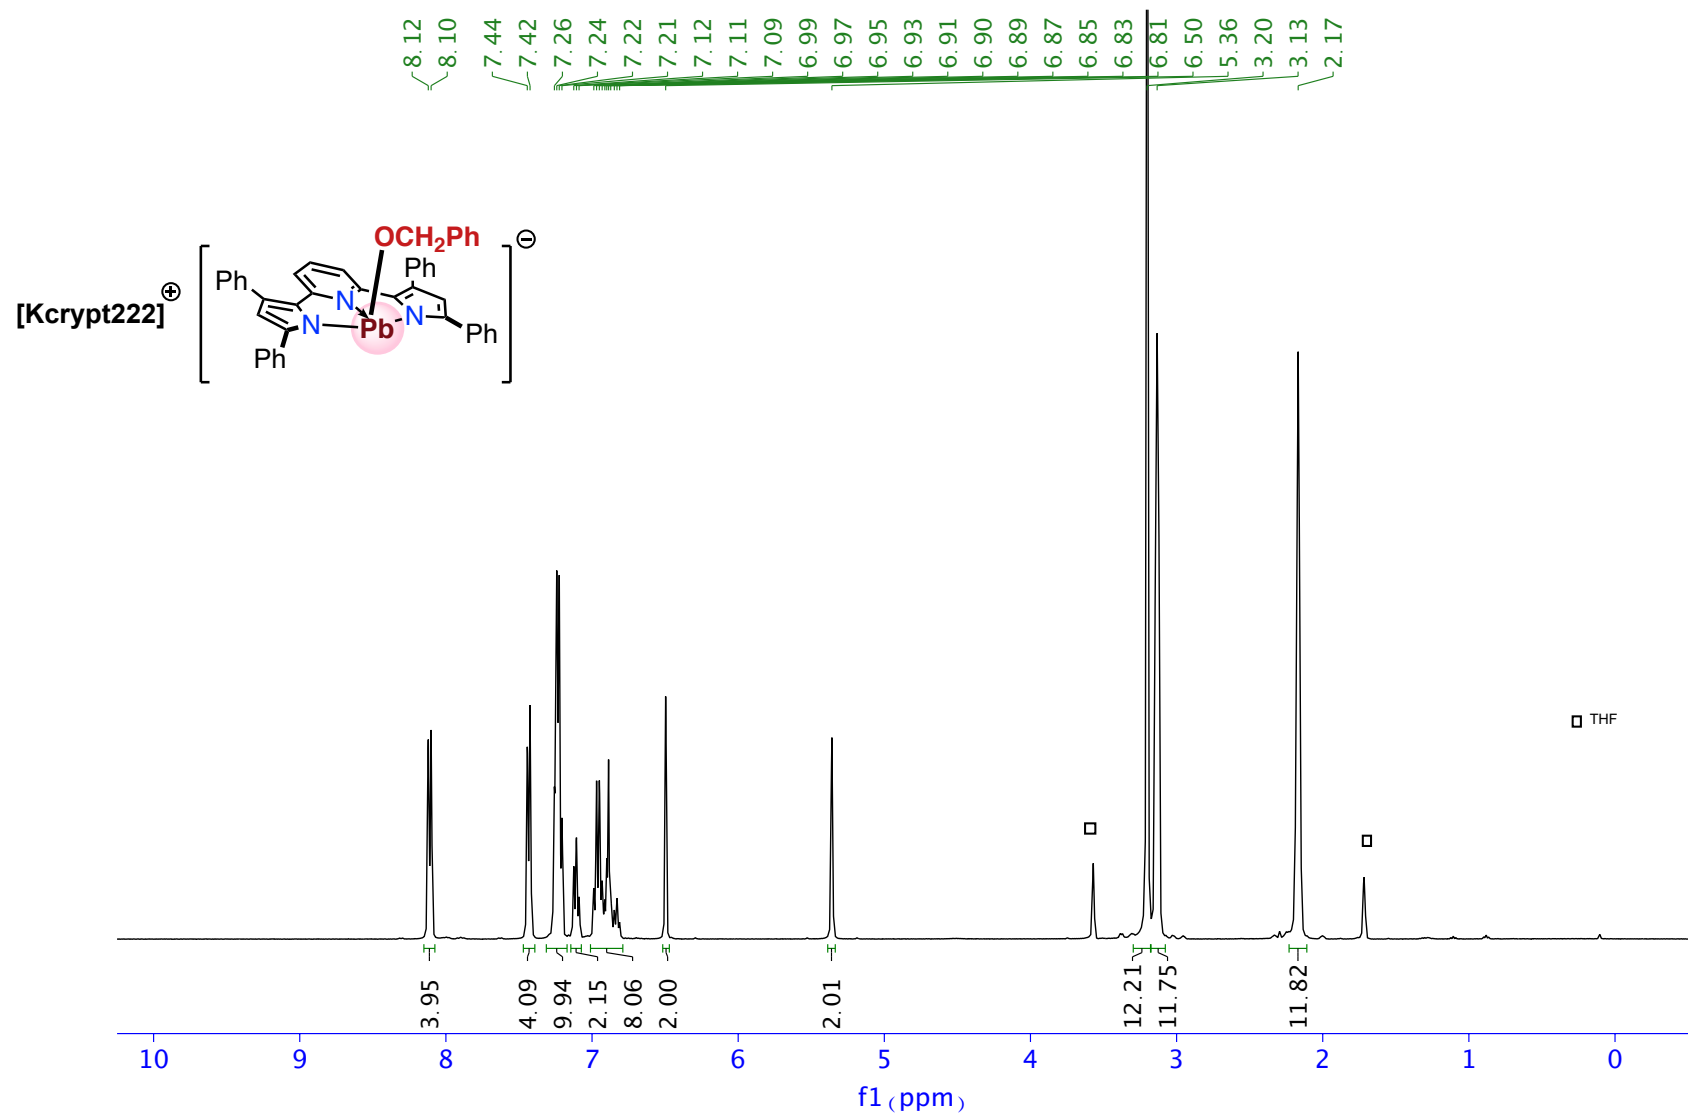

**Figure S16.** <sup>1</sup>H NMR spectrum of [Kcrypt222][1-OBz] (THF-*d*<sub>8</sub>, 298K)

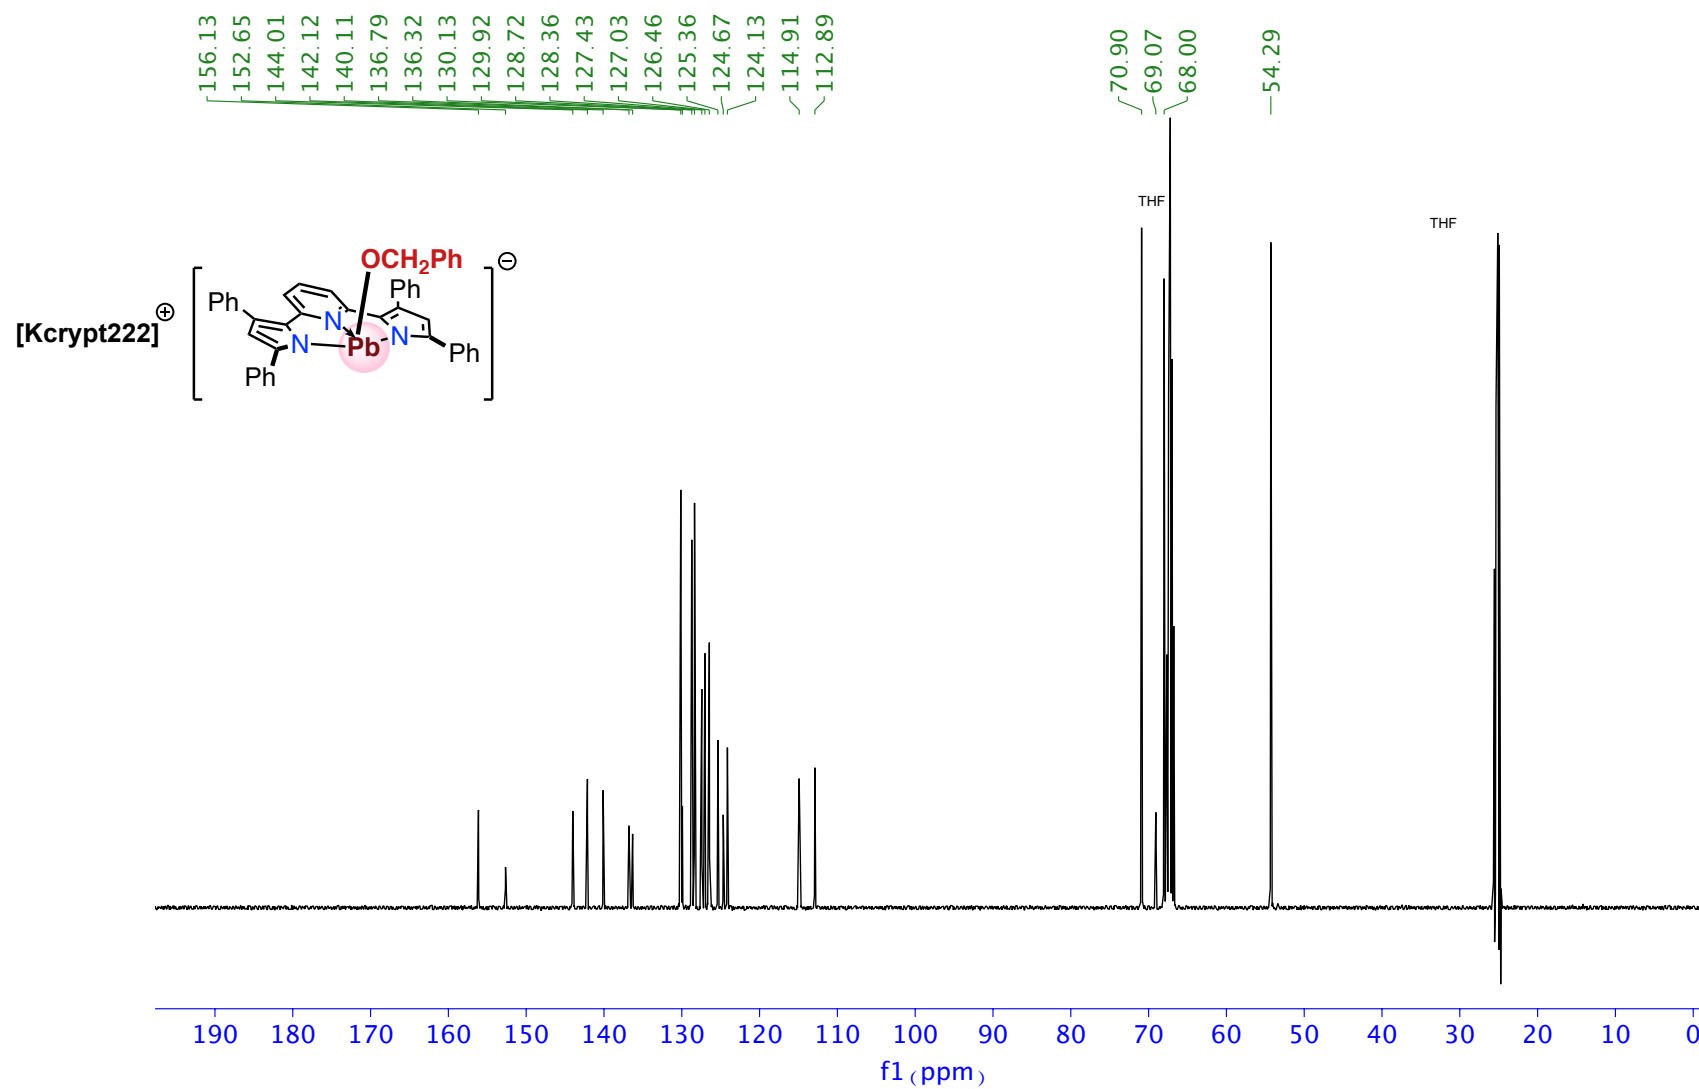

**Figure S17.** <sup>13</sup>C{<sup>1</sup>H} NMR spectrum of [Kcrypt222][1-OBz] (THF-*d*<sub>8</sub>, 298K)

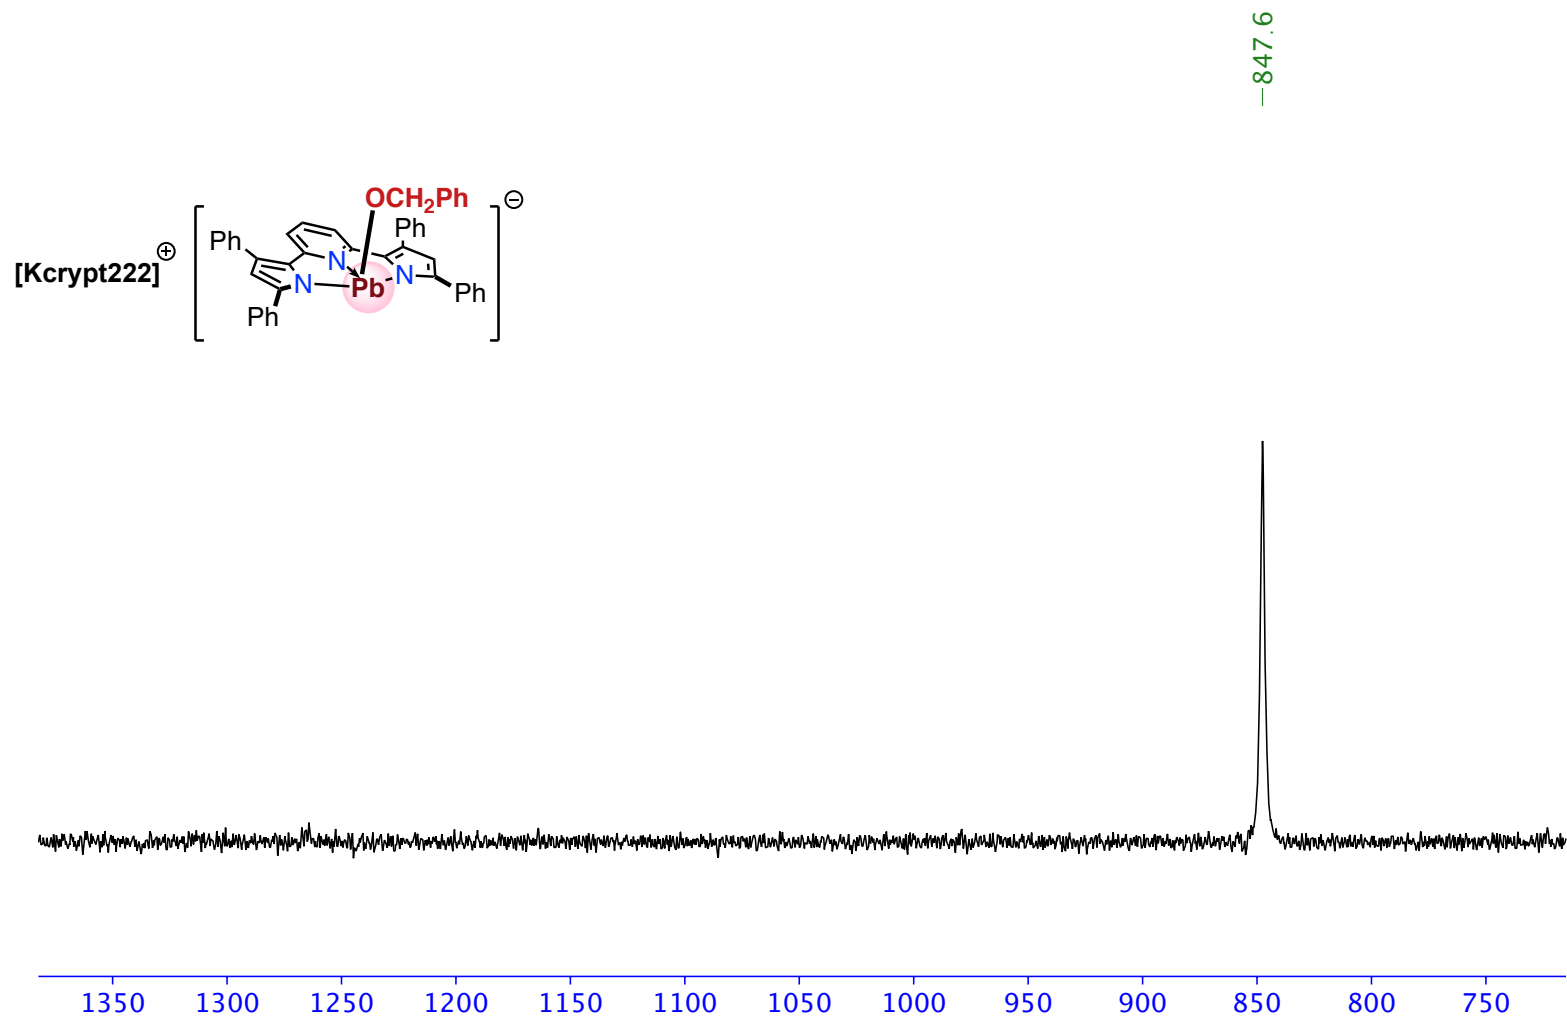

**Figure S18.**  $^{207}\text{Pb}\{^1\text{H}\}$  NMR spectrum of **[Kcrypt222][1-OBz]** (THF- $d_8$ , 298K)

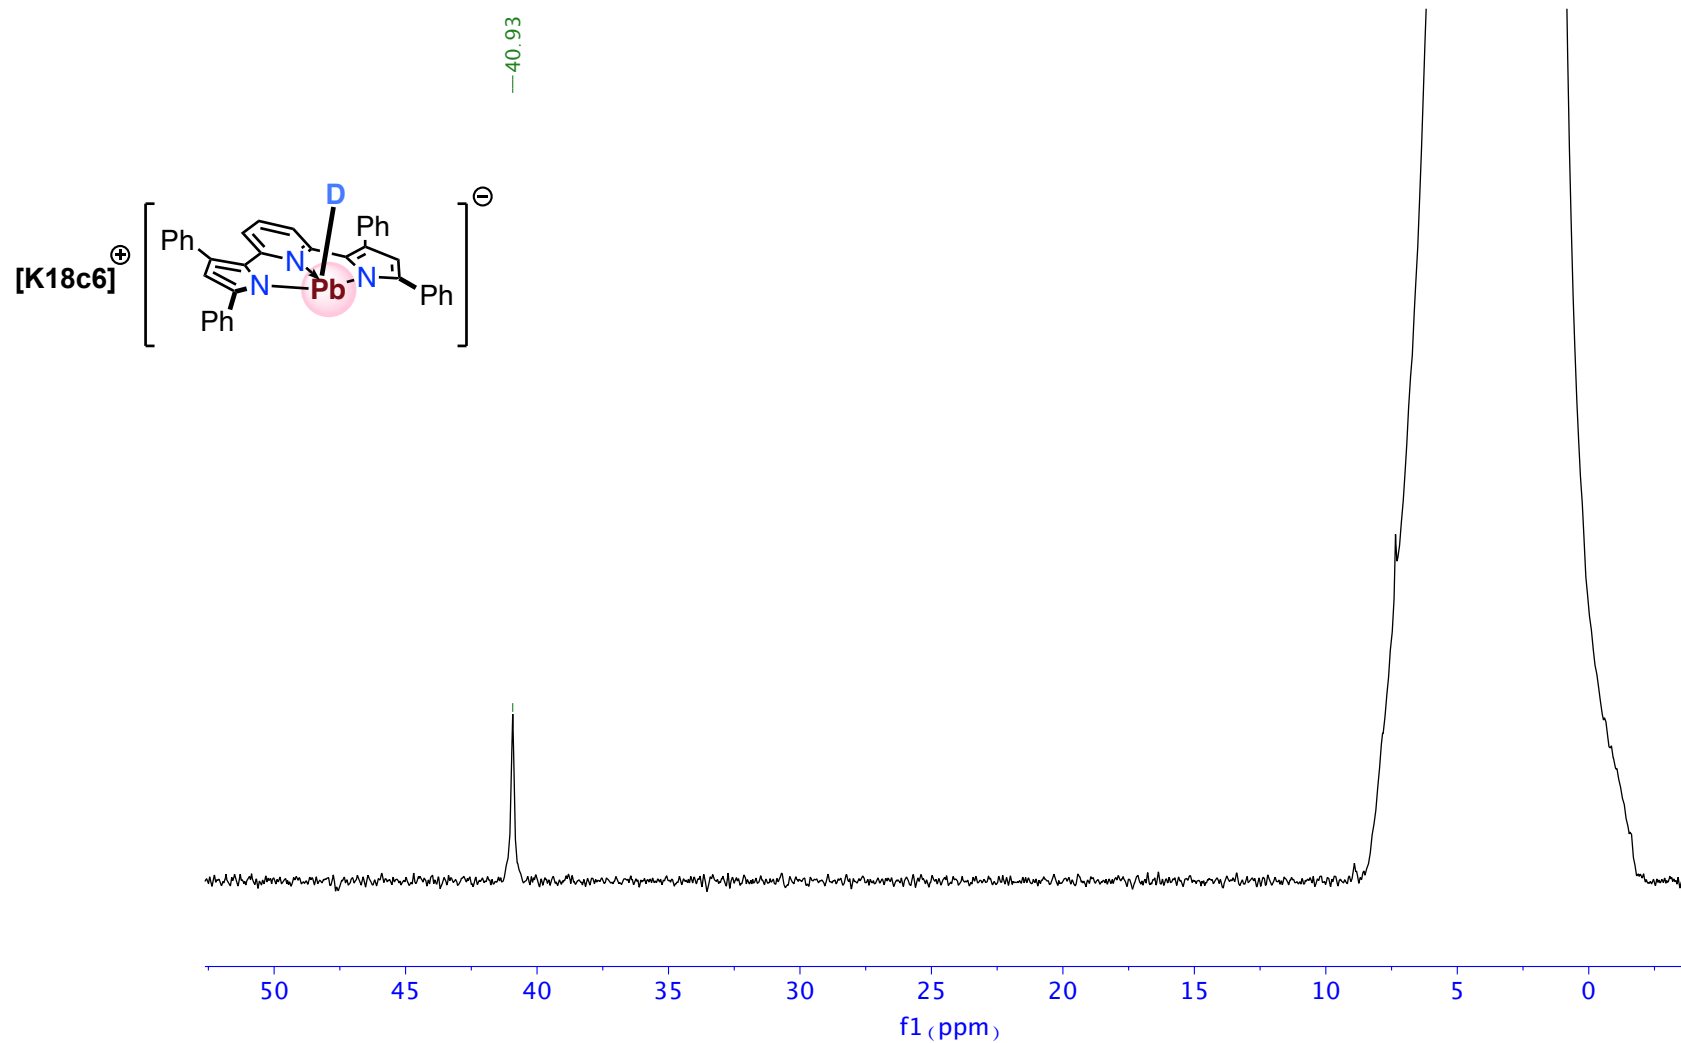

**Figure S19.**  $^2\text{H}$  NMR spectrum of **[K18c6][1-D]** ( $\text{THF-}d_8$ , 263K)

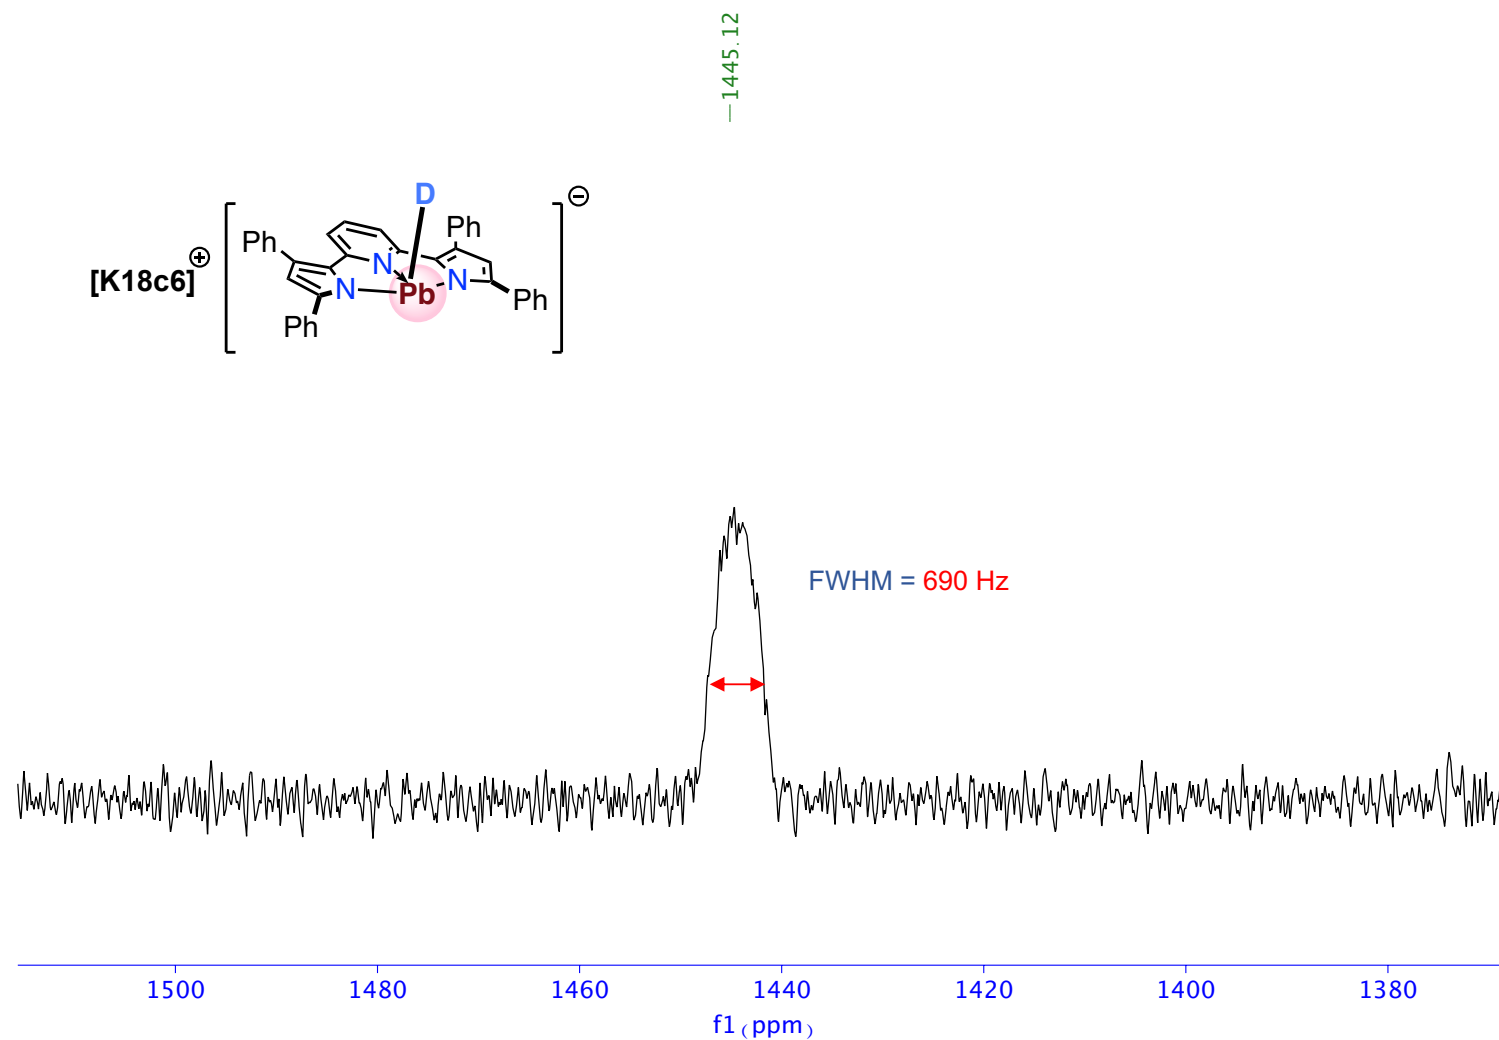

**Figure S20.**  $^{207}\text{Pb}\{^1\text{H}\}$  NMR spectrum of **[K18c6][1-D]** (THF- $d_8$ , 263K)



### 1.3 IR spectrum of [Kcrypt222][1-H] and [Kcrypt222][1-D].

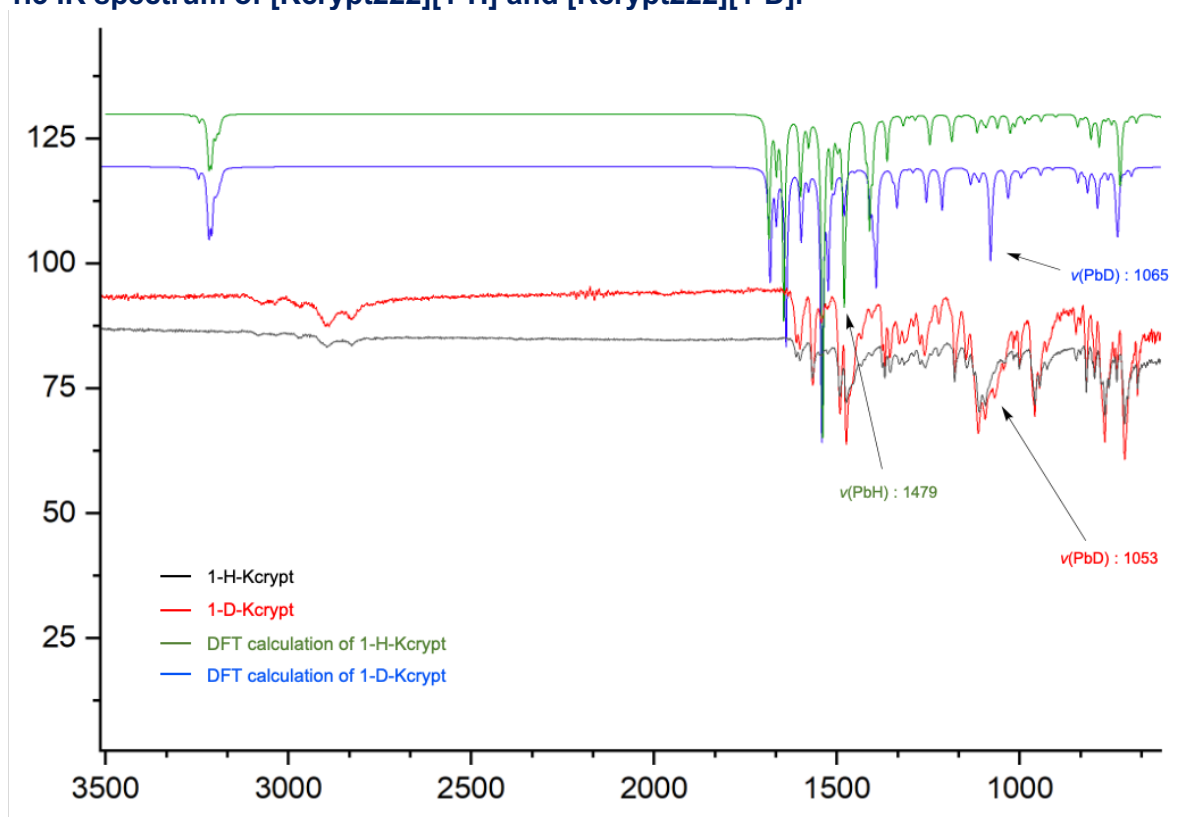

**Figure S21.** The overlapped IR spectrum of [Kcrypt222][1-H] and [Kcrypt222][1-D].

The IR bands predicted by DFT calculations appear closely to those of the experimental spectra. DFT calculations of [1-H]<sup>-</sup> and [1-D]<sup>-</sup> reveal  $\nu_{\text{PbH}}$  and  $\nu_{\text{PbD}}$  at 1479 cm<sup>-1</sup> and 1065 cm<sup>-1</sup>, respectively. The  $\nu_{\text{PbH}}$  of [Kcrypt222][1-H] is likely overlapped with other vibrational bands. The spectrum of [Kcrypt222][1-D] shows the Pb–D stretching band at 1053 cm<sup>-1</sup>.

## 2. Details of ESI(-)-MS measurements and data analysis

A Thermo Scientific LTQ XL linear ion trap mass spectrometer performed the analysis in this work. The samples were pumped using a Thermo Scientific Surveyor MS pump delivering 3  $\mu\text{L}$  /min to electrospray ionization (ESI) source. Each spectrum was acquired 60 scans in negative mode. An ESI voltage of -4.8 kV was applied, combining with the tube lens in -40 V, and the temperature of the ion transfer tube was set to 275  $^{\circ}\text{C}$ . To avoid the samples reacting with oxygen or water vapor, they were transferred to the syringe in a glove box, and the ionization region was purged with nitrogen. The spectra were fitted with the theoretical isotope distributions to confirm the elementary composition of detected ion.

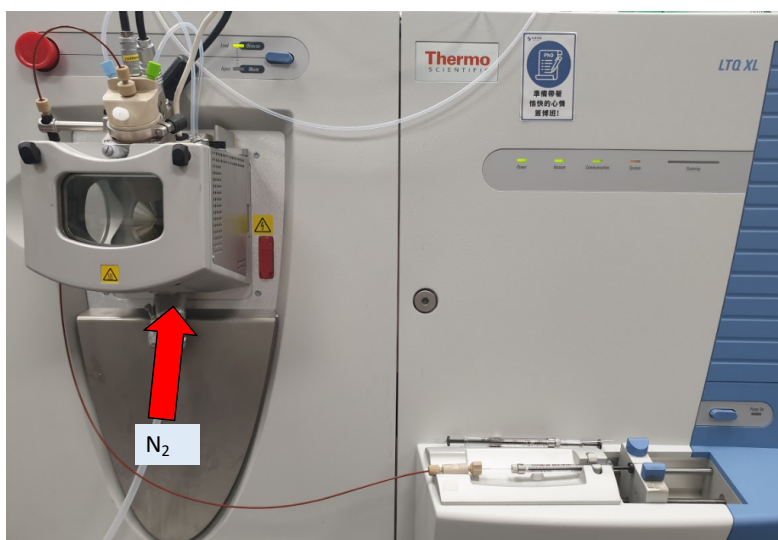

**Figure S22.** The ESI mass spectrometer.

## 2.1 ESI(-)MS Data for [1-H]<sup>-</sup> and [1-D]<sup>-</sup>.

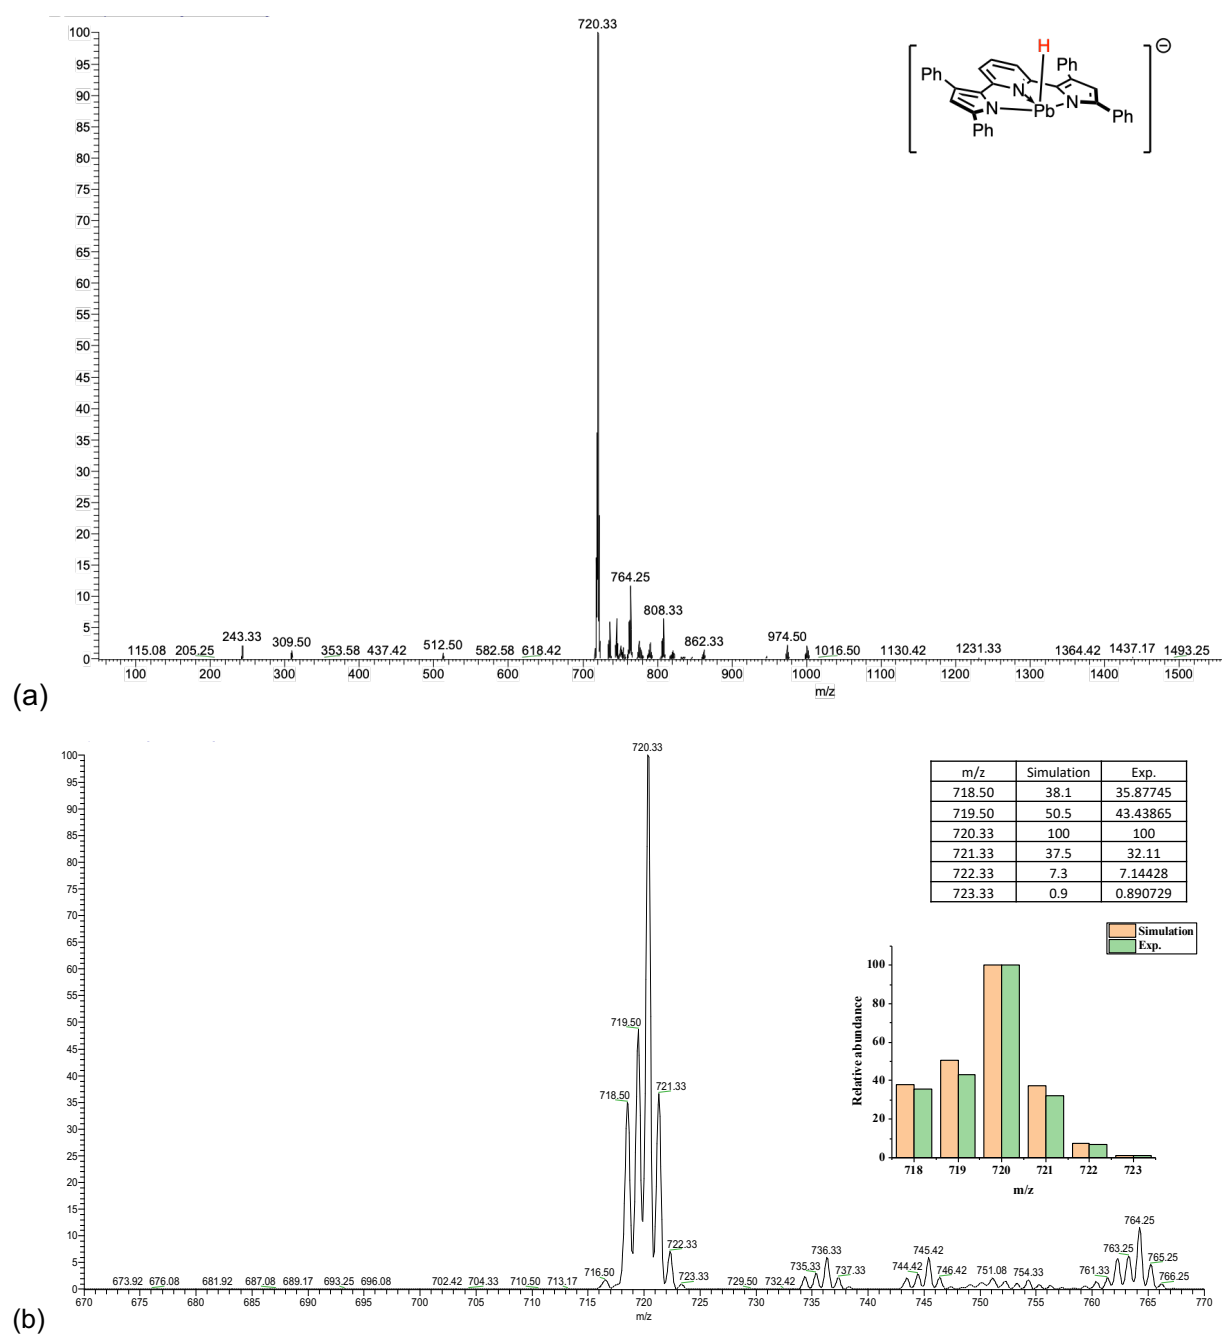

**Figure S23.** (a) ESI-MS(-) spectrum [1-H]<sup>-</sup>. (b) The enlarged part of [1-H]<sup>-</sup> ion signal and the inset shows the normalized comparison of experimental and simulated isotope distributions.

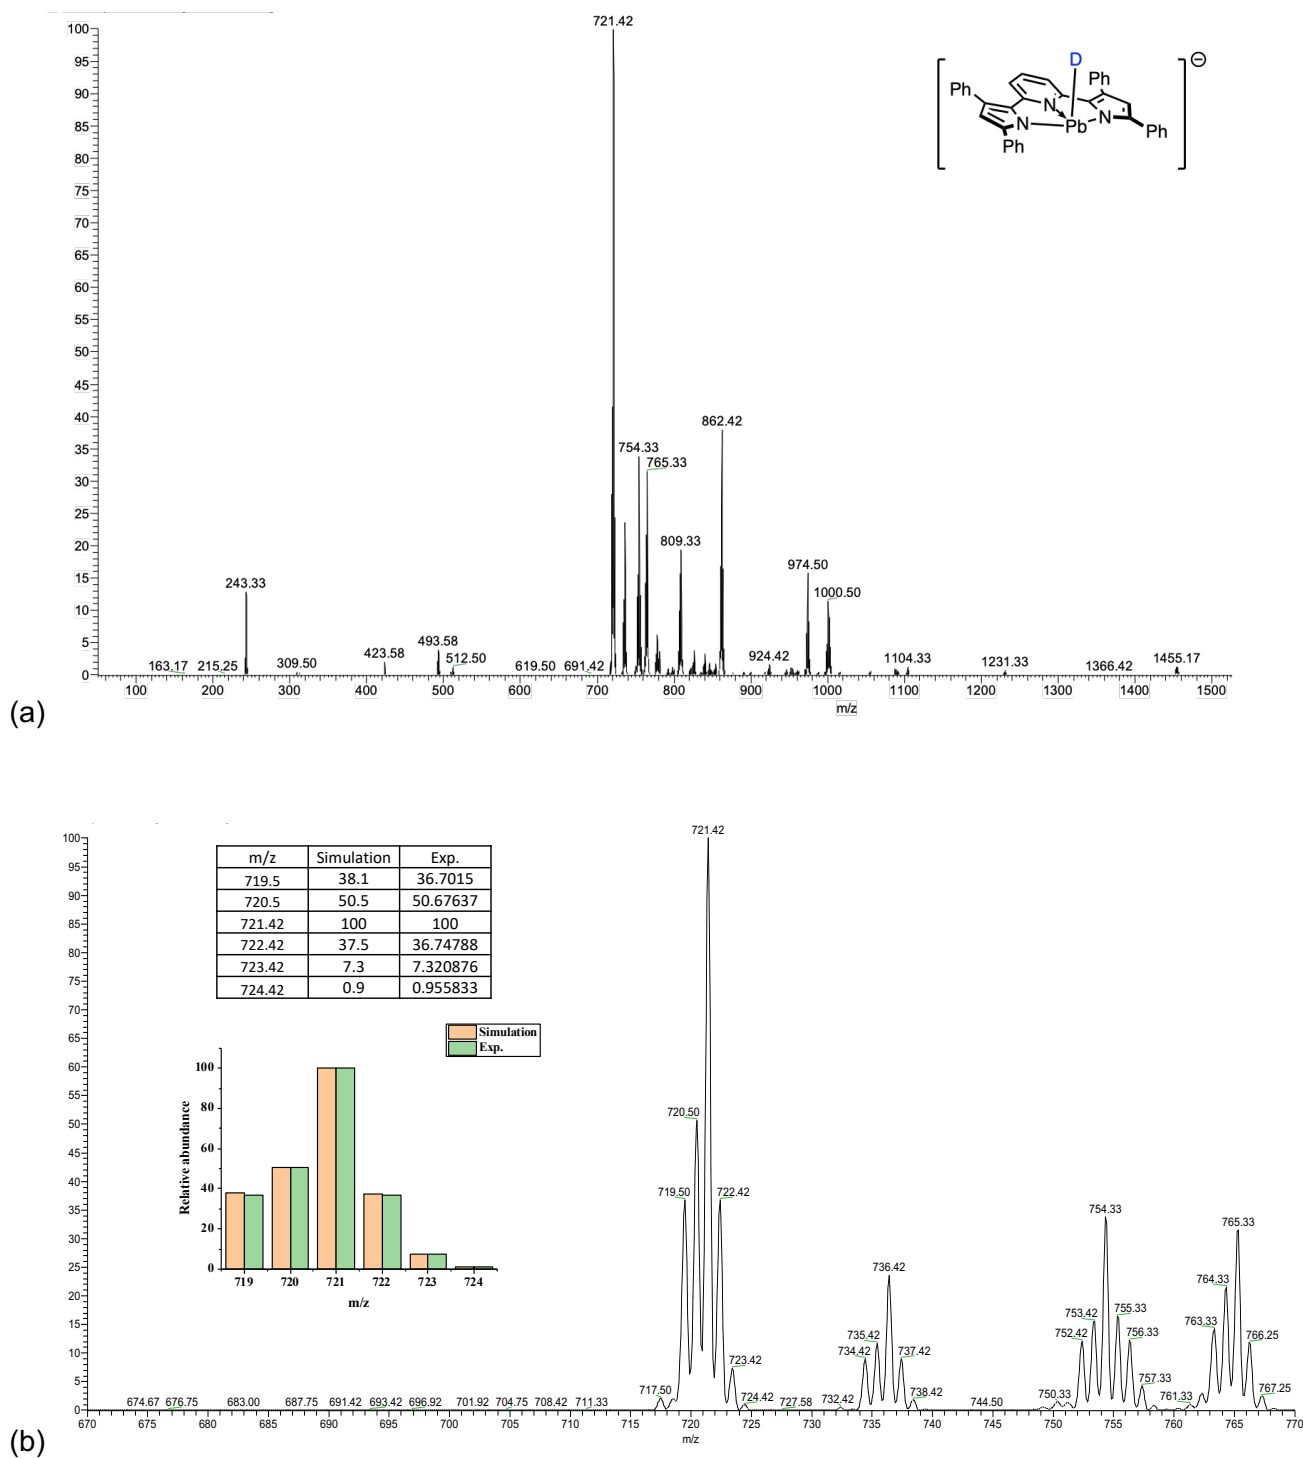

**Figure S24.** (a) ESI-MS(–) spectrum **[1-D]<sup>–</sup>**. (b) The enlarged part of **[1-D]<sup>–</sup>** ion signal and the inset shows the normalized comparison of experimental and simulated results isotope distributions.

### 3. Single-crystal X-ray diffraction crystal structure figures and data tables

Single-crystal X-ray diffraction were performed on a Bruker APEX DUO diffractometer with APEX II 4K and multi-layer mirror monochromated Mo K $\alpha$  radiation ( $\lambda$  = 0.71073 Å) at 200(2) K. Data collection and reduction were performed with Bruker APEX II software. All of non-hydrogen atoms are refined anisotropically. Hydrogen atoms attached to the carbons were fixed at calculated positions and refined using a riding mode. Multiple disordered solvent molecules were observed in the crystal structures of all complexes. Whenever possible, co-crystallizing solvent molecules were modeled. Otherwise, SQUEEZE was employed to treat diffuse solvent contribution in the voids.

**Table S1.** Crystal data and structure refinement for **1-THF**<sub>2</sub> (one THF squeezed)

|                                   |                                                                  |                       |
|-----------------------------------|------------------------------------------------------------------|-----------------------|
| Empirical formula                 | C <sub>45</sub> H <sub>41</sub> N <sub>3</sub> O <sub>2</sub> Pb |                       |
| Formula weight                    | 863.00                                                           |                       |
| Temperature                       | 200(2) K                                                         |                       |
| Wavelength                        | 0.71073 Å                                                        |                       |
| Crystal system                    | Monoclinic                                                       |                       |
| Space group                       | P 21/c                                                           |                       |
| Unit cell dimensions              | a = 15.785(2) Å                                                  | $\alpha$ = 90°.       |
|                                   | b = 14.4681(18) Å                                                | $\beta$ = 91.067(3)°. |
|                                   | c = 21.038(3) Å                                                  | $\gamma$ = 90°.       |
| Volume                            | 4804.0(11) Å <sup>3</sup>                                        |                       |
| Z                                 | 4                                                                |                       |
| Density (calculated)              | 1.193 Mg/m <sup>3</sup>                                          |                       |
| Absorption coefficient            | 3.544 mm <sup>-1</sup>                                           |                       |
| F(000)                            | 1720                                                             |                       |
| Crystal size                      | 0.32 x 0.27 x 0.11 mm <sup>3</sup>                               |                       |
| Theta range for data collection   | 2.13 to 25.23°.                                                  |                       |
| Index ranges                      | -18 ≤ h ≤ 17, -17 ≤ k ≤ 17, -24 ≤ l ≤ 25                         |                       |
| Reflections collected             | 70371                                                            |                       |
| Independent reflections           | 8608 [R(int) = 0.0774]                                           |                       |
| Completeness to theta = 25.23°    | 99.2 %                                                           |                       |
| Absorption correction             | multi-scan                                                       |                       |
| Max. and min. transmission        | 0.6965 and 0.3967                                                |                       |
| Refinement method                 | Full-matrix least-squares on F <sup>2</sup>                      |                       |
| Data / restraints / parameters    | 8608 / 56 / 430                                                  |                       |
| Goodness-of-fit on F <sup>2</sup> | 1.020                                                            |                       |
| Final R indices [I > 2σ(I)]       | R1 = 0.0734, wR2 = 0.2047                                        |                       |
| R indices (all data)              | R1 = 0.1022, wR2 = 0.2181                                        |                       |
| Largest diff. peak and hole       | 2.006 and -1.817 e/Å <sup>-3</sup>                               |                       |

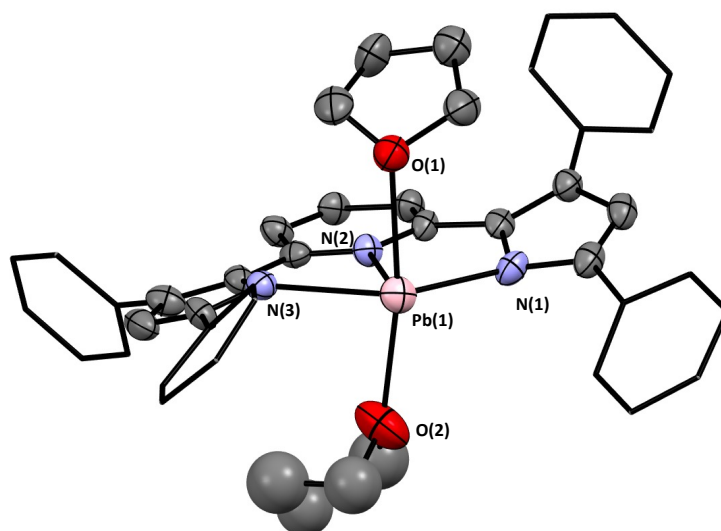

**Figure S25.** ORTEP diagram of **1-THF<sub>2</sub>** (30% thermal ellipsoids; hydrogen atoms omitted). Selected interatomic distances (Å) and angles (°): N(1)–Pb(1) 2.456(9), N(2)–Pb(1) 2.401(7), N(3)–Pb(1) 2.440(8), Pb(1)–O(1) 2.547(8), Pb(1)–O(2) 2.528(12); N(1)–Pb(1)–N(2) 67.8(3), N(2)–Pb(1)–N(3) 67.7(3), N(1)–Pb(1)–N(3) 135.4(3), N(1)–Pb(1)–O(1) 88.0(3), N(2)–Pb(1)–O(1) 82.1(3), N(3)–Pb(1)–O(1) 85.4(3), N(1)–Pb(1)–O(2) 92.4(3), N(2)–Pb(1)–O(2) 84.3(4), N(3)–Pb(1)–O(2) 83.9(4), O(1)–Pb(1)–O(2) 165.1(4).

**Table S2.** Crystal data and structure refinement for **[Kcrypt222][1-H]**

|                                        |                                                                    |                                |
|----------------------------------------|--------------------------------------------------------------------|--------------------------------|
| Empirical formula                      | $C_{55}H_{61}KN_5O_6Pb$                                            |                                |
| Formula weight                         | 1134.38                                                            |                                |
| Temperature                            | 200(2) K                                                           |                                |
| Wavelength                             | 0.71073 Å                                                          |                                |
| Crystal system                         | Monoclinic                                                         |                                |
| Space group                            | P 21/n                                                             |                                |
| Unit cell dimensions                   | $a = 14.2258(4)$ Å                                                 | $\alpha = 90^\circ$ .          |
|                                        | $b = 18.3607(5)$ Å                                                 | $\beta = 100.4360(10)^\circ$ . |
|                                        | $c = 19.9771(5)$ Å                                                 | $\gamma = 90^\circ$ .          |
| Volume                                 | $5131.6(2)$ Å <sup>3</sup>                                         |                                |
| Z                                      | 4                                                                  |                                |
| Density (calculated)                   | 1.468 Mg/m <sup>3</sup>                                            |                                |
| Absorption coefficient                 | $3.423$ mm <sup>-1</sup>                                           |                                |
| F(000)                                 | 2300                                                               |                                |
| Crystal size                           | $0.39 \times 0.30 \times 0.20$ mm <sup>3</sup>                     |                                |
| Theta range for data collection        | $2.22$ to $25.10^\circ$ .                                          |                                |
| Index ranges                           | $-16 \leq h \leq 16$ , $-21 \leq k \leq 21$ , $-19 \leq l \leq 23$ |                                |
| Reflections collected                  | 51385                                                              |                                |
| Independent reflections                | 9112 [ $R(\text{int}) = 0.0563$ ]                                  |                                |
| Completeness to $\theta = 25.10^\circ$ | 99.7 %                                                             |                                |
| Absorption correction                  | multi-scan                                                         |                                |
| Max. and min. transmission             | 0.5476 and 0.3487                                                  |                                |
| Refinement method                      | Full-matrix least-squares on $F^2$                                 |                                |
| Data / restraints / parameters         | 9112 / 0 / 612                                                     |                                |
| Goodness-of-fit on $F^2$               | 1.290                                                              |                                |
| Final R indices [ $I > 2\sigma(I)$ ]   | $R1 = 0.0687$ , $wR2 = 0.1325$                                     |                                |
| R indices (all data)                   | $R1 = 0.0796$ , $wR2 = 0.1362$                                     |                                |
| Largest diff. peak and hole            | $1.485$ and $-3.134$ e/Å <sup>-3</sup>                             |                                |

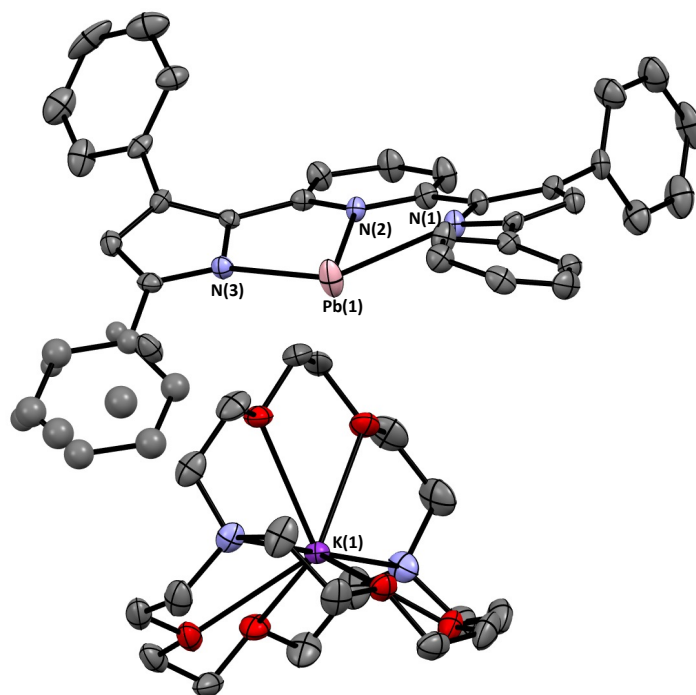

**Figure S26a.** ORTEP of molecular structure of **[Kcrypt222][1-H]**. Thermal ellipsoids are shown at 30% probability level and hydrogen atoms have been omitted for clarity. Selected interatomic distances (Å) and angles (°): N(1)–Pb(1) 2.480(6), N(2)–Pb(1) 2.397(6), N(3)–Pb(1) 2.474(6); N(1)–Pb(1)–N(2) 68.30(2), N(2)–Pb(1)–N(3) 68.47(19), N(1)–Pb(1)–N(3) 136.30(2).

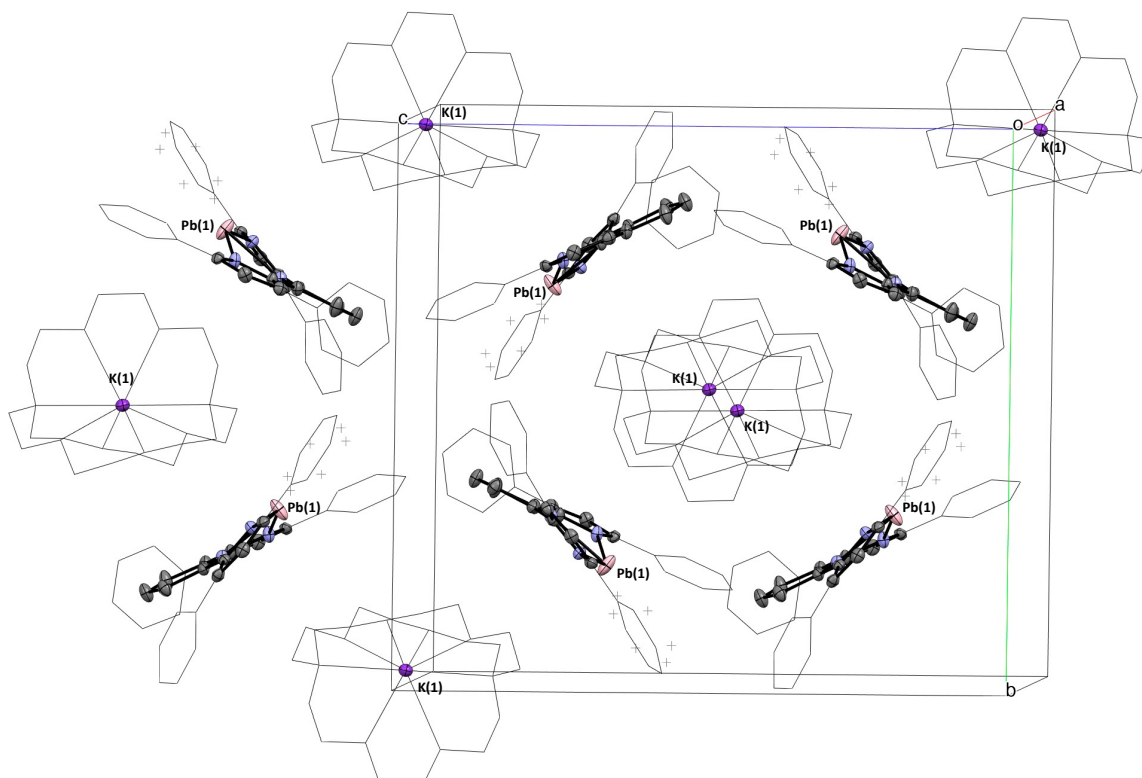

**Figure S26b.** Crystal packing diagram of **[Kcrypt222][1-H]** (30% thermal ellipsoids; hydrogen atoms omitted for clarity).



**Table S3.** Crystal data and structure refinement for **[Kcrypt222][1-OBz]**

|                                        |                                                                    |                            |
|----------------------------------------|--------------------------------------------------------------------|----------------------------|
| Empirical formula                      | $C_{130}H_{142}K_2N_{10}O_{14}Pb_2$                                |                            |
| Formula weight                         | 2561.12                                                            |                            |
| Temperature                            | 200(2) K                                                           |                            |
| Wavelength                             | 0.71073 Å                                                          |                            |
| Crystal system                         | Monoclinic                                                         |                            |
| Space group                            | P 21/c                                                             |                            |
| Unit cell dimensions                   | $a = 14.4354(4)$ Å                                                 | $a = 90^\circ$ .           |
|                                        | $b = 29.6617(9)$ Å                                                 | $b = 103.1340(10)^\circ$ . |
|                                        | $c = 28.4501(9)$ Å                                                 | $c = 90^\circ$ .           |
| Volume                                 | $11863.1(6)$ Å <sup>3</sup>                                        |                            |
| Z                                      | 4                                                                  |                            |
| Density (calculated)                   | 1.434 Mg/m <sup>3</sup>                                            |                            |
| Absorption coefficient                 | 2.972 mm <sup>-1</sup>                                             |                            |
| F(000)                                 | 5224                                                               |                            |
| Crystal size                           | 0.22 x 0.14 x 0.02 mm <sup>3</sup>                                 |                            |
| Theta range for data collection        | 2.19 to 25.05°.                                                    |                            |
| Index ranges                           | $-16 \leq h \leq 17$ , $-35 \leq k \leq 35$ , $-33 \leq l \leq 33$ |                            |
| Reflections collected                  | 220399                                                             |                            |
| Independent reflections                | 20992 [ $R(\text{int}) = 0.1083$ ]                                 |                            |
| Completeness to $\theta = 25.05^\circ$ | 99.8 %                                                             |                            |
| Absorption correction                  | multi-scan                                                         |                            |
| Max. and min. transmission             | 0.9430 and 0.5609                                                  |                            |
| Refinement method                      | Full-matrix least-squares on $F^2$                                 |                            |
| Data / restraints / parameters         | 20992 / 0 / 1417                                                   |                            |
| Goodness-of-fit on $F^2$               | 1.029                                                              |                            |
| Final R indices [ $ I  > 2\sigma(I)$ ] | $R1 = 0.0385$ , $wR2 = 0.0682$                                     |                            |
| R indices (all data)                   | $R1 = 0.0733$ , $wR2 = 0.0795$                                     |                            |
| Largest diff. peak and hole            | 1.862 and -1.785 e.Å <sup>-3</sup>                                 |                            |

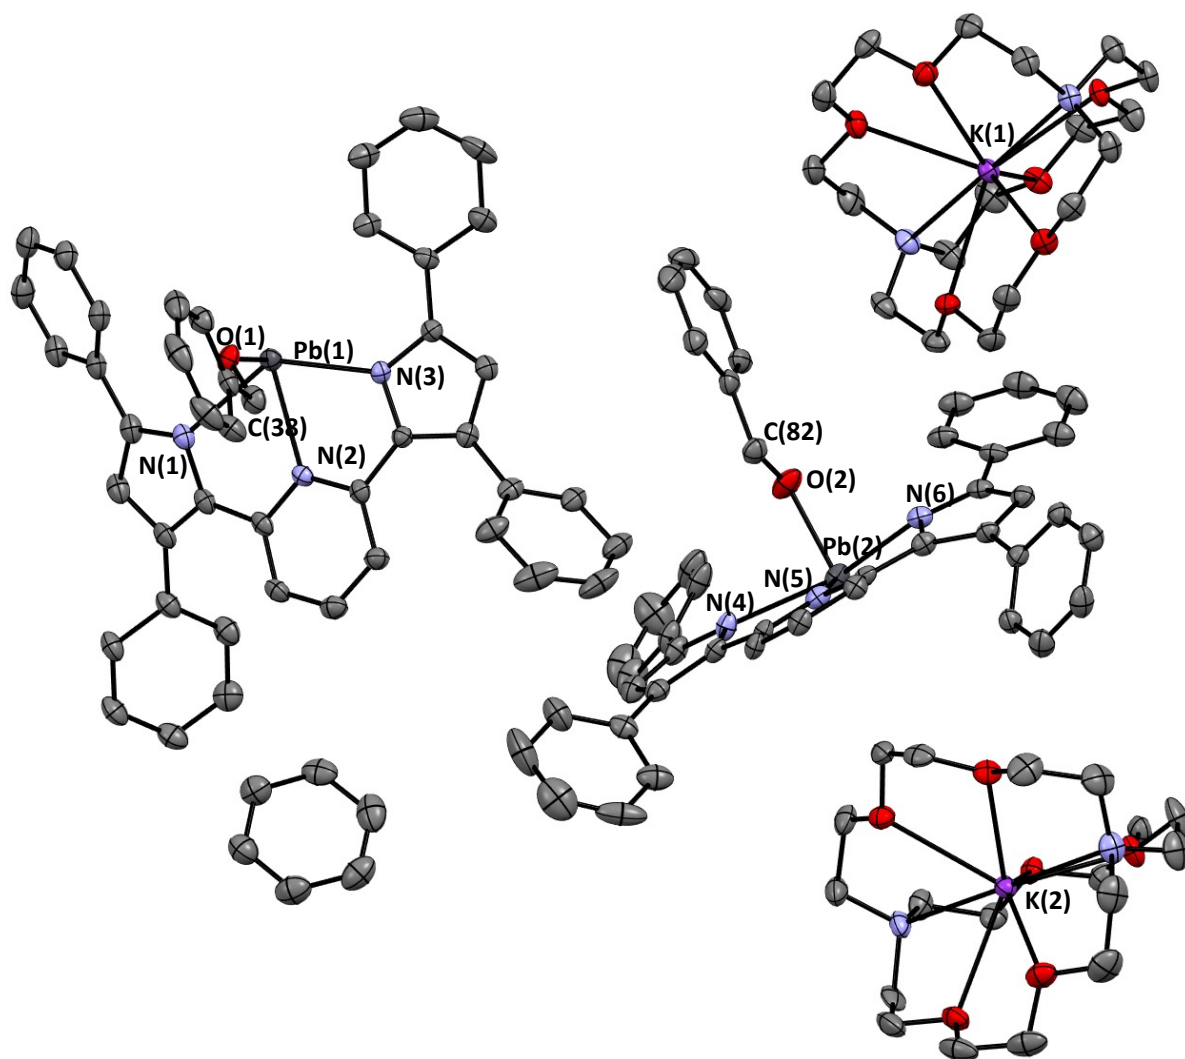

**Figure S27.** ORTEP diagram of **[Kcrypt222][1-OBz]** (30% thermal ellipsoids; hydrogen atoms omitted for clarity). Selected interatomic distances (Å) and angles (°): N(1)–Pb(1) 2.515(4), N(2)–Pb(1) 2.413(4), N(3)–Pb(1) 2.433(3), O(1)–Pb(1) 2.157(3), O(1)–C(38) 1.378(6), N(4)–Pb(2) 2.463(4), N(5)–Pb(2) 2.415(4), N(6)–Pb(2) 2.501(4), O(2)–Pb(2) 2.148(4), O(2)–C(82) 1.369(6); O(1)–Pb(1)–N(2) 92.43(12), C(38)–O(1)–Pb(1) 120.5(3), O(1)–Pb(1)–N(2) 101.29(13), C(82)–O(2)–Pb(2) 122.9(3).

## 4. Computational details

Density Functional Theory (DFT) calculations were performed with the Gaussian 16 suite of programs.<sup>4</sup> Geometry optimizations were applied by the means of the PBE0<sup>5</sup> hybrid functional, corrected for dispersion as proposed by Grimme (D3 correction, BJ damping),<sup>6,7</sup> and performed without any symmetry constraints using 6-311G(d,p) basis set for H, C, and N, and Def2-TZVP<sup>8</sup> basis set for Pb. NBO analyses were performed with NBO 6.0.<sup>9</sup> Input structures were taken from the experimentally observed X-ray diffraction structures of the anion [1-H]<sup>-</sup> part of [Kcrypt222][1-H].

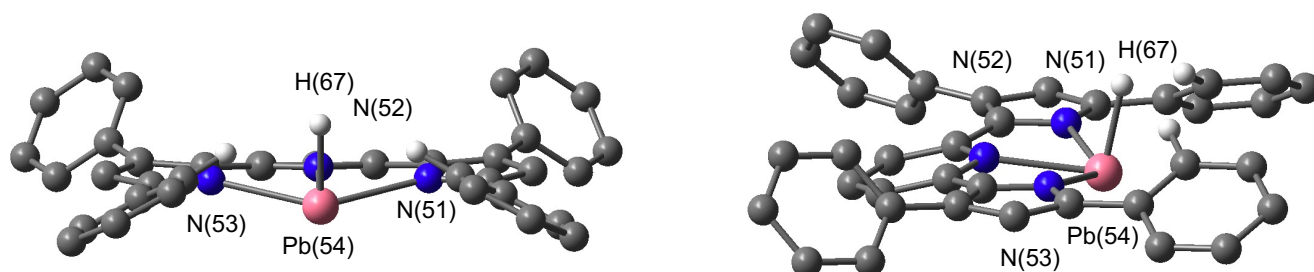

**Figure S28.** Optimized of molecular structure of [1-H]<sup>-</sup> anion. Hydrogen atoms have been omitted for clarity. Selected interatomic distances (Å) and angles (°): N(51)–Pb(54) 2.493, N(52)–Pb(54) 2.431, N(53)–Pb(54) 2.493, H(67)–Pb(54) 1.866; N(51)–Pb(54)–N(52) 67.30, N(52)–Pb(54)–N(53) 67.30, N(51)–Pb(54)–N(53) 133.02, N(52)–Pb(54)–H(67) 95.8.

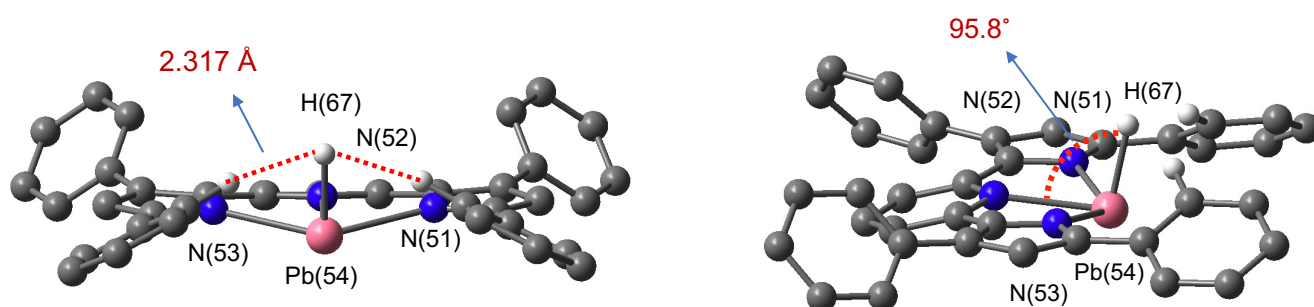

**Figure S29** Selected interatomic distances showing DHB interactions (Å): H(67)–H(65) 2.317, H(67)–H(4) 2.317; and ∠H–Pb–N angle of 95.8°.

**Table S4.** Comparison of selected bond lengths and bond angles between solid state structure of [Kcrypt222][1-H] and calculated structure of [1-H]<sup>-</sup>

|                                         | Experimental (crystal structure)<br>data of [Kcrypt222][1-H] | Calculated structure of [1-H] <sup>-</sup> |
|-----------------------------------------|--------------------------------------------------------------|--------------------------------------------|
| N <sub>pyrrole</sub> –Pb                | 2.480(6) Å                                                   | 2.493 Å                                    |
| N <sub>pyridine</sub> –Pb               | 2.397(6) Å                                                   | 2.431 Å                                    |
| N <sub>pyrrole</sub> –Pb                | 2.474(6) Å                                                   | 2.493 Å                                    |
| Pb(54)–H(67)                            |                                                              | 1.866 Å                                    |
| N <sub>pyridine</sub> (52)–Pb(54)–H(67) |                                                              | 95.81°                                     |

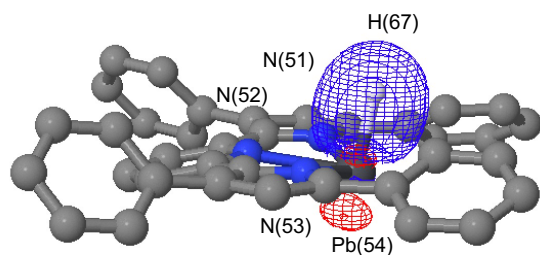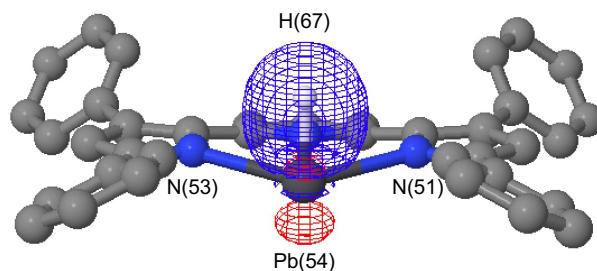

**Figure S30** NBO diagram of **[1-H]<sup>-</sup>**.

Coordinates for the optimized structure of **[1-H]<sup>-</sup>**

|   |             |             |             |
|---|-------------|-------------|-------------|
| C | 3.54081300  | -0.95363200 | 0.05399100  |
| C | 3.81309300  | -2.38320300 | 0.14103300  |
| C | 2.90734700  | -3.26350000 | 0.75021600  |
| H | 2.00603000  | -2.86171200 | 1.20399300  |
| C | 3.17270300  | -4.62420000 | 0.82089700  |
| H | 2.45284200  | -5.28274400 | 1.29823500  |
| C | 4.35445000  | -5.14308600 | 0.30212300  |
| H | 4.56050800  | -6.20741800 | 0.35932500  |
| C | 5.27042000  | -4.27838700 | -0.29053800 |
| H | 6.19653900  | -4.66860100 | -0.70331200 |
| C | 5.00223000  | -2.92023800 | -0.37374800 |
| H | 5.70809000  | -2.25723300 | -0.86434700 |
| C | 4.47623400  | 0.08927500  | 0.02289700  |
| H | 5.55041200  | -0.00122900 | 0.11787100  |
| C | 3.75344100  | 1.28943300  | 0.00259700  |
| C | 4.37969100  | 2.61089300  | 0.10444100  |
| C | 3.96125200  | 3.55435400  | 1.05343200  |
| H | 3.12919900  | 3.30366100  | 1.70339200  |
| C | 4.59420300  | 4.78343000  | 1.17093600  |
| H | 4.24810300  | 5.49536400  | 1.91458200  |
| C | 5.67463800  | 5.10089800  | 0.35274700  |
| H | 6.17113600  | 6.06171400  | 0.44698600  |
| C | 6.11174600  | 4.17146500  | -0.58421800 |
| H | 6.95287600  | 4.40582400  | -1.23044400 |
| C | 5.47093600  | 2.94509400  | -0.70775000 |
| H | 5.80179000  | 2.22650400  | -1.45105900 |
| C | 2.38697700  | 0.90513200  | -0.01607100 |
| C | 1.17937500  | 1.68886900  | -0.19955200 |
| C | 1.20059300  | 3.04795500  | -0.53905600 |
| H | 2.14381300  | 3.55229300  | -0.69025700 |
| C | -0.00003800 | 3.71210600  | -0.71547600 |
| H | -0.00004700 | 4.75835500  | -1.00759300 |
| C | -1.20065800 | 3.04795400  | -0.53899500 |
| H | -2.14389300 | 3.55228800  | -0.69013000 |
| C | -1.17941000 | 1.68886500  | -0.19951600 |
| C | -2.38699900 | 0.90513100  | -0.01600100 |
| C | -3.75345500 | 1.28943800  | 0.00258000  |
| C | -4.37967000 | 2.61093300  | 0.10418900  |
| C | -3.96108700 | 3.55460000  | 1.05291100  |
| H | -3.12896900 | 3.30402700  | 1.70283400  |
| C | -4.59397500 | 4.78373000  | 1.17019000  |
| H | -4.24776800 | 5.49582500  | 1.91363200  |
| C | -5.67447700 | 5.10105100  | 0.35203300  |
| H | -6.17092400 | 6.06191100  | 0.44609600  |
| C | -6.11171000 | 4.17142500  | -0.58468200 |

|    |             |             |             |
|----|-------------|-------------|-------------|
| H  | -6.95288500 | 4.40567300  | -1.23088700 |
| C  | -5.47096100 | 2.94499900  | -0.70799300 |
| H  | -5.80190700 | 2.22625400  | -1.45111200 |
| C  | -4.47625400 | 0.08928700  | 0.02311000  |
| H  | -5.55042800 | -0.00119800 | 0.11813200  |
| N  | 2.28671500  | -0.44745500 | 0.03317800  |
| N  | -0.00001400 | 1.03859200  | -0.07538500 |
| N  | -2.28673500 | -0.44745100 | 0.03333000  |
| Pb | -0.00002400 | -1.38140800 | -0.30669700 |
| C  | -3.81311000 | -2.38318600 | 0.14142500  |
| C  | -5.00228200 | -2.92026500 | -0.37323100 |
| H  | -5.70817400 | -2.25730200 | -0.86384300 |
| C  | -5.27046800 | -4.27840600 | -0.28988600 |
| H  | -6.19661500 | -4.66865500 | -0.70256600 |
| C  | -4.35446200 | -5.14305400 | 0.30279200  |
| H  | -4.56051700 | -6.20738100 | 0.36010000  |
| C  | -3.17268000 | -4.62412400 | 0.82144300  |
| H  | -2.45278900 | -5.28262800 | 1.29879300  |
| C  | -2.90732600 | -3.26343100 | 0.75062600  |
| H  | -2.00597900 | -2.86160500 | 1.20430900  |
| C  | -3.54083300 | -0.95362400 | 0.05424000  |
| H  | 0.00004500  | -1.74622300 | 1.52374500  |

## 5. References

- 1 Nagata, T. & Tanaka, K. Syntheses of a 6-(2-Pyrrolyl)-2,2'-bipyridine Derivative and Its Ruthenium Complex. *Bull. Chem. Soc. Jpn.* **75**, 2469-2470, (2002).
- 2 Glock, C. *et al.* Calcium, Strontium, Germanium, Tin, and Lead bis(trimethylsilyl)amido Derivatives and 2,2,6,6-Tetramethylpiperidido and N-isopropylphenylamido Derivatives of Potassium and Calcium. *Inorg. Synth.*, 15-31, (2018).
- 3 Espinal-Viguri, M., Neale, S. E., Coles, N. T., Macgregor, S. A. & Webster, R. L. Room Temperature Iron-Catalyzed Transfer Hydrogenation and Regioselective Deuteration of Carbon–Carbon Double Bonds. *J. Am. Chem. Soc.* **141**, 572-582, (2019).
- 4 Gaussian 16 Rev. C.01 (Wallingford, CT, 2016).
- 5 Adamo, C. & Barone, V. Toward reliable density functional methods without adjustable parameters: The PBE0 model. *J. Chem. Phys.* **110**, 6158-6170, (1999).
- 6 Grimme, S., Antony, J., Ehrlich, S. & Krieg, H. A consistent and accurate ab initio parametrization of density functional dispersion correction (DFT-D) for the 94 elements H-Pu. *J. Chem. Phys.* **132**, 154104, (2010).
- 7 Grimme, S., Ehrlich, S. & Goerigk, L. Effect of the damping function in dispersion corrected density functional theory. *J. Comput. Chem.* **32**, 1456-1465, (2011).
- 8 Weigend, F. & Ahlrichs, R. Balanced basis sets of split valence, triple zeta valence and quadruple zeta valence quality for H to Rn: Design and assessment of accuracy. *Phys. Chem. Chem. Phys.* **7**, 3297-3305, (2005).
- 9 Glendening, E. D., Landis, C. R. & Weinhold, F. NBO 6.0: Natural bond orbital analysis program. *J. Comput. Chem.* **34**, 1429-1437, (2013).
